# Supplementary material for: Predicting copper-, iron-, and zinc-binding proteins in pathogenic species of the Paracoccidioides genus
Source: Front Microbiol. 2015 Jan 9;5:761. doi: 10.3389/fmicb.2014.00761 (PMC4288321; doi:10.3389/fmicb.2014.00761)
Supplement: Supplementary file 2 [file Table2.XLSX]

## Sheet: Copper Pb03
Supplementary Table 2 - Cu, Fe and Zn proteins found in Paracoccidioides spp. isolate Pb03
Pb03 Accession number	Protein description	Functional classification	Localization
PABG_03825	copper amine oxidase	metabolism of amines	Mithocondrial matrix
PABG_06242	conserved hypothetical protein	_	Nuclear
PABG_05975	predicted protein	_	_
PABG_04737	copper amine oxidase	aminoacid metabolism	Mithocondrial matrix
PABG_01525	tyrosinase	degradation of tyrosine	secreted
PABG_03739	copper-containing nitrite reductase	nitrogen metabolism	Mitochondrial
PABG_06956	xanthine dehydrogenase	purin nucleotide/nucleoside/nucleobase metabolism	cytoplasmic
PABG_03125	xanthine dehydrogenase	purin nucleotide/nucleoside/nucleobase metabolism	cytoplasmic
PABG_00887	glyoxal oxidase	lipid, fatty acid and isoprenoid metabolism	cytoplasmic
PABG_00803	amine oxidase	metabolism of amines	Nuclear
PABG_02316	copper amine oxidase	metabolism of amines	Mithocondrial matrix
PABG_05667	laccase IV	metabolism of melanins	Cytoplasmic and Nuclear
PABG_00738	conidial pigment biosynthesis oxidase Arb2	metabolism of melanins	Secreted (extracellular)
PABG_05183	laccase	metabolism of melanins	secreted
PABG_05210	cytochrome c oxidase copper chaperone	accessory proteins of electron transport and membrane-associated energy conservation	Mithocondrial inner membrane
PABG_03780	cytochrome c oxidase copper chaperone	respiration	Mithocondrial inner membrane
PABG_07429	copper fist DNA binding domain-containing protein	transcriptional control	Nuclear
PABG_06777	copper-activated transcription factor	transcriptional activation	nuclear
PABG_02495	copper-transporting P-type ATPase	ion transport	Plasma membrane protein
PABG_03057	copper-transporting ATPase	ion transport	Plasma membrane-bound
PABG_07607	high affinity copper transporter	ion transport	cytoplasmic
PABG_04277	Ctr copper transpoter	ion transport	Integral membrane protein
PABG_00906	copper-transporting P-type ATPase copA	ion transport	Integral membrane protein
PABG_01536	Ctr copper transporter family protein	ion transport	Integral membrane protein
PABG_03954	superoxide dismutase	superoxide metabolism	cytoplasmic
PABG_00431	cytosolic Cu/Zn superoxide dismutase	superoxide metabolism	Secreted (extracellular)

## Sheet: Iron Pb03
Supplementary Table 2 - Cu, Fe and Zn proteins found in Paracoccidioides spp. isolate Pb03
Pb03 Accession number	Protein description	Functional classification	Localization
PABG_07471	conserved hypothetical protein [Paracoccidioides brasiliensis Pb03]	_	_
PABG_01040	conserved hypothetical protein [Paracoccidioides brasiliensis Pb03]	_	_
PABG_00226	conserved hypothetical protein [Paracoccidioides brasiliensis Pb03]	_	_
PABG_07086	isochorismatase family protein family protein [Paracoccidioides brasiliensis Pb03]	_
PABG_01582	conserved hypothetical protein [Paracoccidioides brasiliensis Pb03]	_	_
PABG_01410	conserved hypothetical protein [Paracoccidioides brasiliensis Pb03]	_	_
PABG_01623	conserved hypothetical protein [Paracoccidioides brasiliensis Pb03]	_	_
PABG_04356	conserved hypothetical protein [Paracoccidioides brasiliensis Pb03]	_	_
PABG_07385	aminotransferase [Paracoccidioides brasiliensis Pb03]	amino acid metabolism	Integral membrane protein
PABG_02759	diphthamide biosynthesis protein [Paracoccidioides brasiliensis Pb03]	amino acid metabolism	Type 1 membrane protein
PABG_05235	diphthamide biosynthesis protein [Paracoccidioides brasiliensis Pb03]	amino acid metabolism	Type 1 membrane protein
PABG_00922	sulfite reductase hemoprotein beta-component [Paracoccidioides brasiliensis Pb03]	amino acid metabolism	cytoplasmic
PABG_05875	hydroxyacylglutathione hydrolase	amino acid metabolism	glyoxysomal
PABG_01641	taurine catabolism dioxygenase	amino acid metabolism
PABG_03531	glutamate synthase [Paracoccidioides brasiliensis Pb03]	assimilation of ammonia, metabolism of the glutamate group	cytoplasmic
PABG_01291	urease [Paracoccidioides brasiliensis Pb03]	metabolism of urea (urea cycle)	cytoplasmic
PABG_06909	1,2-dihydroxy-3-keto-5-methylthiopentene dioxygenase [Paracoccidioides brasiliensis Pb03]	metabolism of methionine	cytoplasmic and nuclear
PABG_02199	trimethyllysine dioxygenase [Paracoccidioides brasiliensis Pb03]	metabolism of lysine	cytoplasmic
PABG_03102	4-hydroxyphenylpyruvate dioxygenase [Paracoccidioides brasiliensis Pb03]	biosynthesis of glycine	cytoplasmic
PABG_02904	cysteine dioxygenase [Paracoccidioides brasiliensis Pb03]	degradation of cysteine	Nuclear
PABG_07392	homogentisate 1,2-dioxygenase [Paracoccidioides brasiliensis Pb03]	degradation of tyrosine	cytoplasmic
PABG_00108	3-hydroxyanthranilate 3,4-dioxygenase [Paracoccidioides brasiliensis Pb03]	degradation of tryptophan	cytoplasmic
PABG_07715	histidinol-phosphatase [Paracoccidioides brasiliensis Pb03]	biosynthesis of histidine	cytoplasmic
PABG_07394	4-hydroxyphenylpyruvate dioxygenase [Paracoccidioides brasiliensis Pb03]	metabolism of the pyruvate family	cytoplasmic
PABG_00926	radical SAM domain-containing protein [Paracoccidioides brasiliensis Pb03]	Sulfur metabolism	mitochondrial
PABG_07162	allantoinase [Paracoccidioides brasiliensis Pb03]	nucleotide/nucleoside/nucleobase metabolism	mitochondrial
PABG_00548	thymine dioxygenase [Paracoccidioides brasiliensis Pb03]	nucleotide/nucleoside/nucleobase metabolism	cytoplasmic
PABG_06812	nucleotidase of the calcineurin superfamily protein [Paracoccidioides brasiliensis Pb03]	nucleotide/nucleoside/nucleobase metabolism	nuclear
PABG_06956	xanthine dehydrogenase [Paracoccidioides brasiliensis Pb03]	purin nucleotide/nucleoside/nucleobase metabolism	cytoplasmic
PABG_03125	xanthine dehydrogenase [Paracoccidioides brasiliensis Pb03]	purin nucleotide/nucleoside/nucleobase metabolism	cytoplasmic
PABG_03623	guanine deaminase [Paracoccidioides brasiliensis Pb03]	purin nucleotide/nucleoside/nucleobase metabolism	mitochondrial
PABG_04982	ribonucleoside-diphosphate reductase small chain A [Paracoccidioides brasiliensis Pb03]	deoxyribonucleotide metabolism	cytoplasmic
PABG_00445	endopolyphosphatase [Paracoccidioides brasiliensis Pb03]	phosphate metabolism	secreted
PABG_06413	metallophosphoesterase domain-containing protein	phosphate metabolism	cytoplasmic
PABG_07773	lactoylglutathione lyase [Paracoccidioides brasiliensis Pb03]	C-compound and carbohydrate metabolism	_
PABG_06553	succinate dehydrogenase iron-sulfur subunit [Paracoccidioides brasiliensis Pb03]	C-compound and carbohydrate metabolism	mitchondrial
PABG_04504	3-isopropylmalate dehydratase large subunit [Paracoccidioides brasiliensis Pb03]	C-compound and carbohydrate metabolism	mitochondrial
PABG_00753	galactose-1-phosphate uridylyltransferase [Paracoccidioides brasiliensis Pb03]	C-compound and carbohydrate metabolism	Matrix and cytoplasmic side of the mitochondrial inner membrane
PABG_06939	homoaconitase [Paracoccidioides brasiliensis Pb03]	C-compound and carbohydrate metabolism	mitochondrial
PABG_03698	gamma-butyrobetaine dioxygenase [Paracoccidioides brasiliensis Pb03]	C-compound and carbohydrate metabolism	mitochondrial
PABG_01977	inositol oxygenase [Paracoccidioides brasiliensis Pb03]	sugar, glucoside, polyol and carboxylate metabolism	peroxisomal
PABG_00211	inositol oxygenase [Paracoccidioides brasiliensis Pb03]	sugar, glucoside, polyol and carboxylate metabolism	peroxisomal
PABG_07039	ubiquinone biosynthesis protein CAT5 [Paracoccidioides brasiliensis Pb03]	regulation of C-compound and carbohydrate metabolism	secreted
PABG_06125	carotenoid cleavage dioxygenase	metabolism of vitamins, cofactors, and prosthetic groups	_
PABG_00292	ferrochelatase [Paracoccidioides brasiliensis Pb03]	biosynthesis of vitamins, cofactors, and prosthetic groups	mitochondrial
PABG_06107	molybdenum cofactor biosynthesis protein 1 B [Paracoccidioides brasiliensis Pb03]	biosynthesis of vitamins, cofactors, and prosthetic groups	mitochondrial
PABG_07386	biotin synthase [Paracoccidioides brasiliensis Pb03]	biosynthesis of vitamins, cofactors, and prosthetic groups	mitochondrial
PABG_05724	lipoyl synthase [Paracoccidioides brasiliensis Pb03]	biosynthesis of vitamins, cofactors, and prosthetic groups	mitchondrial
PABG_04040	2Fe-2S iron-sulfur cluster binding domain-containing protein	biosynthesis of vitamins, cofactors, and prosthetic groups	mitochondrial
PABG_05951	chlorocatechol 1,2-dioxygenase [Paracoccidioides brasiliensis Pb03]	secondary metabolism	cytoplasmic
PABG_04505	metallo-beta-lactamase domain-containing protein [Paracoccidioides brasiliensis Pb03]	secondary metabolism	mitochondrial
PABG_04313	extradiol ring-cleavage dioxygenase [Paracoccidioides brasiliensis Pb03]	secondary metabolism	cytoplasmic
PABG_00699	beta-lactamase domain-containing protein [Paracoccidioides brasiliensis Pb03]	secondary metabolism	cytoplasmic and nuclear
PABG_07002	2OG-Fe(II) oxygenase [Paracoccidioides brasiliensis Pb03]	secondary metabolism	cytoplasmic
PABG_01964	beta-lactamase domain-containing protein [Paracoccidioides brasiliensis Pb03]	secondary metabolism
PABG_07749	aconitate hydratase [Paracoccidioides brasiliensis Pb03]	tricarboxylic-acid pathway (citrate cycle, Krebs cycle, TCA cycle)	cytoplasmic
PABG_06980	NADH-quinone oxidoreductase subunit G [Paracoccidioides brasiliensis Pb03]	electron transport and membrane-associated energy conservation	mitochondrial
PABG_07445	NADH-ubiquinone oxidoreductase 23 kDa subunit [Paracoccidioides brasiliensis Pb03]	electron transport and membrane-associated energy conservation	mitchondrial
PABG_03139	NADH-ubiquinone oxidoreductase 51 kDa subunit [Paracoccidioides brasiliensis Pb03]	electron transport and membrane-associated energy conservation	mitochondrial
PABG_04801	cytochrome b-c1 complex subunit Rieske [Paracoccidioides brasiliensis Pb03]	electron transport and membrane-associated energy conservation	Mitochondrial inner membrane
PABG_04841	oxidoreductase	electron transport and membrane-associated energy conservation	cytoplasmic
PABG_04994	oxidoreductase	electron transport and membrane-associated energy conservation	cytoplasmic
PABG_01627	NADH dehydrogenase flavoprotein [Paracoccidioides brasiliensis Pb03]	electron transport and membrane-associated energy conservation	mitochondrial
PABG_01762	oxidoreductase [Paracoccidioides brasiliensis Pb03]	electron transport and membrane-associated energy conservation	mitochondrial
PABG_04966	oxidoreductase	electron transport and membrane-associated energy conservation	mitochondrial
PABG_01661	alternative oxidase [Paracoccidioides brasiliensis Pb03]	respiration	mitochondrial
PABG_06165	DNA primase large subunit [Paracoccidioides brasiliensis Pb03]	DNA synthesis and replication	nuclear
PABG_07612	double-strand break repair protein mus-23 [Paracoccidioides brasiliensis Pb03]	DNA recombination and DNA repair	nuclear
PABG_04889	tRNA(m5U54)methyltransferase [Paracoccidioides brasiliensis Pb03]	DNA repair	nuclear
PABG_06694	elongator complex protein	DNA conformation modification (e.g. chromatin)	nuclear
PABG_01523	cell division control protein	mitotic cell cycle and cell cycle control	_
PABG_06128	endoribonuclease ysh1 [Paracoccidioides brasiliensis Pb03]	mRNA synthesis	nuclear
PABG_00085	pirin [Paracoccidioides brasiliensis Pb03]	mRNA synthesis	nuclear
PABG_02810	ZZ type zinc finger protein	transcriptional control	Nuclear
PABG_04080	histone demethylase JARID1C [Paracoccidioides brasiliensis Pb03]	DNA conformation modification (e.g. chromatin)	nuclear
PABG_00523	jumonji family transcription factor	transcriptional control	_
PABG_02393	GRF zinc finger domain-containing protein	transcriptional control
PABG_03328	translation iniciation factor	translation iniciation	mitochondrial
PABG_03714	PKHD-type hydroxylase TPA1	translation termination	nuclear
PABG_03577	DUF455 domain-containing protein (ferritin-like domain)	protein modification	_
PABG_07840	serine/threonine-protein phosphatase PP-Z [Paracoccidioides brasiliensis Pb03]	modification by phosphorylation, dephosphorylation, autophosphorylation	nuclear
PABG_05902	ser/Thr protein phosphatase family protein	modification by phosphorylation, dephosphorylation, autophosphorylation	cytoplasmic
PABG_04575	serine/threonine-protein phosphatase PP2A catalytic subunit [Paracoccidioides brasiliensis Pb03]	modification by phosphorylation, dephosphorylation, autophosphorylation	nuclear
PABG_07608	serine/threonine-protein phosphatase PP-V [Paracoccidioides brasiliensis Pb03]	modification by phosphorylation, dephosphorylation, autophosphorylation	cytoplasmic
PABG_03882	Ser/Thr protein phosphatase family protein	modification by phosphorylation, dephosphorylation, autophosphorylation	_
PABG_03963	serine/threonine protein phosphatase 2B catalytic subunit 2 [Paracoccidioides brasiliensis Pb03]	modification by phosphorylation, dephosphorylation, autophosphorylation	cutoplasmic
PABG_04871	serine/threonine-protein phosphatase PP2A catalytic subunit [Paracoccidioides brasiliensis Pb03]	modification by phosphorylation, dephosphorylation, autophosphorylation	nuclear
PABG_04940	serine/threonine-protein phosphatase 4 catalytic subunit [Paracoccidioides brasiliensis Pb03]	modification by phosphorylation, dephosphorylation, autophosphorylation	nuclear
PABG_02114	ser/Thr protein phosphatase family protein	modification by phosphorylation, dephosphorylation, autophosphorylation	mitochondrial
PABG_03593	ser/Thr protein phosphatase family	modification by phosphorylation, dephosphorylation, autophosphorylation	secrted
PABG_06737	serine/threonine-protein phosphatase PP1 [Paracoccidioides brasiliensis Pb03]	modification by phosphorylation, dephosphorylation, autophosphorylation	cytoplasmic
PABG_06884	O-sialoglycoprotein endopeptidase [Paracoccidioides brasiliensis Pb03]	protein/peptide degradation	cytoplasmic
PABG_04355	iron-sulfur cluster-binding protein	protein binding	_
PABG_03108	iron sulfur assembly protein [Paracoccidioides brasiliensis Pb03]	protein binding	mitochondrial
PABG_03238	iron-sulfur cluster assembly associated protein Nar1 [Paracoccidioides brasiliensis Pb03]	protein binding	cytoplasmic
PABG_01960	iron-sulfur cluster assembly family protein [Paracoccidioides brasiliensis Pb03]	protein binding	cytoplasmic and nuclear
PABG_04710	iron sulfur cluster assembly protein [Paracoccidioides brasiliensis Pb03]	protein binding	secreted
PABG_07219	conserved hypothetical protein [Paracoccidioides brasiliensis Pb03]	_	_
PABG_03170	cupin domain-containing protein	DNA binding	_
PABG_00362	calcium transporter [Paracoccidioides brasiliensis Pb03]	cation transport (H+, Na+, K+, Ca2+ , NH4+, etc.)	Integral membrane protein
PABG_05530	phytanoyl-CoA dioxygenase family protein [Paracoccidioides brasiliensis Pb03]	electron transport	cytoplasmic
PABG_03054	metallophosphoesterase [Paracoccidioides brasiliensis Pb03]	electron transport	Cytoplasmic and nuclear
PABG_07053	phytanoyl-CoA dioxygenase domain containing 1 [Paracoccidioides brasiliensis Pb03]	electron transport	mitochondrial
PABG_02178	electron transfer flavoprotein-ubiquinone oxidoreductase [Paracoccidioides brasiliensis Pb03]	electron transport	Mitochondrial inner membrane
PABG_03633	2OG-Fe(II) oxygenase [Paracoccidioides brasiliensis Pb03]	electron transport	cytoplasmic
PABG_02915	calpain [Paracoccidioides brasiliensis Pb03]	electron transport	cytoplasmic
PABG_03204	superoxide dismutase [Paracoccidioides brasiliensis Pb03]	superoxide metabolism	mitochondrial
PABG_03387	superoxide dismutase [Paracoccidioides brasiliensis Pb03]	superoxide metabolism	mitochondrial
PABG_02770	superoxide dismutase	superoxide metabolism	mitochondrial
PABG_01147	rhodocoxin reductase [Paracoccidioides brasiliensis Pb03]	homeostasis	mitochondrial matrix
PABG_01275	HIRA-interacting protein [Paracoccidioides brasiliensis Pb03]	homeostasis of metal ions (Na, K, Ca etc.)	mitochondrial

## Sheet: Zinc Pb03
Supplementary Table 2 - Cu, Fe and Zn proteins found in P. brasiliensis isolate Pb03
Pb03 Accession number	Protein description	Functional classification	Localization
PABG_07700	type-2 proteins geranylgeranyltransferase subunit beta	lipid, fatty acid and isoprenoid metabolism	Cytoplasmic
PABG_07362	predicted protein [Paracoccidioides brasiliensis Pb03]	_	_
PABG_05518	glutathione-dependent formaldehyde-activating	_	cytoplasmic
PABG_01040	conserved hypothetica protein	_	_
PABG_01058	predicted protein	_	_
PABG_01117	predicted protein	_	mitochondrial
PABG_01155	predicted protein	_	nuclear
PABG_02682	conserved hypothetica protein	_	mitochondrial
PABG_00253	1 DUF636 domain-containing protein	_	secreted
PABG_00528	conserved hypothetica protein	_	cytoplasmic
PABG_00534	predicted protein	_	secreted
PABG_04870	predicted protein	_	nuclear
PABG_03762	predicted protein	_	nuclear
PABG_05101	conserved hypothetica protein	_	_
PABG_06384	predicted protein	_	nuclear
PABG_06664	conserved hypothetica protein	_	nuclear
PABG_00839	MYND finger	_	cytoplasmic
PABG_07621	predicted protein	_	_
PABG_07827	predicted protein	_	_
PABG_04302	conserved hypothetica protein	_	_
PABG_04472	conserved hypothetica protein	_	_
PABG_04907	predicted protein	_	_
PABG_05614	spindle poison sensitivity protein Scp3	_	nuclear
PABG_05801	predicted protein	_	nuclear
PABG_04475	N-carbamoyl-L-amino acid hydrolase	amino acid metabolism	mitochondrial
PABG_01291	urease	metabolism of urea (urea cycle)	cytoplasmic
PABG_07587	Cobalamin-independent synthase [Paracoccidioides brasiliensis Pb03]	biosynthesis of methionine	mitochondrial
PABG_03086	homocitrate synthase	biosynthesis of lysine	Cytoplasmic and nuclear
PABG_02447	pentafunctional AROM polypeptide	metabolism of the cysteine - aromatic group	cytoplasmic
PABG_05972	histidine biosynthesis trifunctional protein	biosynthesis of histidine	cytoplasmic
PABG_07162	allantoinase	nitrogen, sulfur and selenium metabolism	mitochondrial
PABG_04266	nitrogen regulatory protein areA	regulation of nitrogen, sulfur and selenium metabolism	nuclear
PABG_07028	formamidase	nitrogen, sulfur and selenium metabolism	cytoplasmic
PABG_04431	adenosine deaminase family protein	nucleotide/nucleoside/nucleobase metabolism	Cytoplasmic and nuclear
PABG_06812	5'-nucleotidase	nucleotide/nucleoside/nucleobase metabolism	nuclear
PABG_06164	adenylate kinase	purin nucleotide/nucleoside/nucleobase metabolism	secreted
PABG_04097	adenosine deaminase family protein	purin nucleotide/nucleoside/nucleobase metabolism	secreted
PABG_03623	guanine deaminase	purin nucleotide/nucleoside/nucleobase metabolism	mitochondrial
PABG_03720	ectonucleotide pyrophosphatase/phosphodiesterase	purin nucleotide/nucleoside/nucleobase metabolism	nuclear
PABG_03809	AMP deaminase	purin nucleotide/nucleoside/nucleobase metabolism	nuclear
PABG_06782	adenosine deaminase	purin nucleotide/nucleoside/nucleobase metabolism	cytoplasmic
PABG_03792	cytidine deaminase	pyrimidine nucleotide/nucleoside/nucleobase metabolism	cytoplasmic
PABG_01717	adenylate cyclase	metabolism of cyclic and unusual nucleotides	nuclear
PABG_07552	deoxyribonuclease tatD [Paracoccidioides brasiliensis Pb03]	DNA degradation	cytoplasmic
PABG_07757	phosphatase [Paracoccidioides brasiliensis Pb03]	phosphate metabolism	mitochondrial
PABG_03054	metallophosphoesterase	phosphate metabolism	Secreted andPlasma membrane-bound
PABG_01067	alkaline phosphatase	phosphate metabolism	mitochondrial
PABG_04112	NADH pyrophosphatase	phosphate metabolism	cytoplasmic
PABG_00445	endopolyphosphatase	phosphate metabolism	nuclear
PABG_04765	alkaline phosphatase	phosphate metabolism	secreted
PABG_06656	protein phosphatase 2C	phosphate metabolism	cytoplasmic and nuclear
PABG_06413	metallophosphoesterase domain-containing protein	phosphate metabolism	cytoplasmic and nuclear
PABG_07773	lactoylglutathione lyase	C-compound and carbohydrate metabolism	nuclear
PABG_05423	zinc-containing alcohol dehydrogenase superfamily protein	C-compound and carbohydrate metabolism	cytoplasmic
PABG_01201	sorbitol dehydrogenase [Paracoccidioides brasiliensis Pb03]	C-compound and carbohydrate metabolism	Cytoplasmic
PABG_07869	sugar isomerase	C-compound and carbohydrate metabolism	mitochondrial
PABG_07394	4-hydroxyphenylpyruvate dioxygenase [Paracoccidioides brasiliensis Pb03]	C-compound and carbohydrate metabolism	cytoplasmic
PABG_02939	alcohol dehydrogenase	C-compound and carbohydrate metabolism	mitochondrial
PABG_01137	NADP-dependent alcohol dehydrogenase C	C-compound and carbohydrate metabolism	mitochondrial
PABG_02619	zinc-containing alcohol dehydrogenase superfamily protein	C-compound and carbohydrate metabolism	Cytoplasmic and nuclear
PABG_02727	alcohol dehydrogenase	C-compound and carbohydrate metabolism	secreted
PABG_06289	carbonic anhydrase	C-compound and carbohydrate metabolism	cytoplasmic
PABG_05998	sorbitol dehydrogenase	C-compound and carbohydrate metabolism	mitochondrial
PABG_07631	alcohol dehydrogenase	C-compound and carbohydrate metabolism	mitochondrial and secreted
PABG_04316	alcohol dehydrogenase GroES domain-containing protein	C-compound and carbohydrate metabolism	cytoplasmic
PABG_00820	S-(hydroxymethyl)glutathione dehydrogenase	C-compound and carbohydrate metabolism	cytoplasmic
PABG_03102	4-hydroxyphenylpyruvate dioxygenase	C-compound and carbohydrate metabolism	Cytoplasmic and nuclear
PABG_03169	alcohol dehydrogenase	C-compound and carbohydrate metabolism	cytoplasmic and mitochondrial
PABG_03417	alcohol dehydrogenase	C-compound and carbohydrate metabolism	cytoplasmic
PABG_04993	2-amino-3-carboxymuconate-6-semialdehyde decarboxylase	C-compound and carbohydrate metabolism	Cytoplasmic and nuclear
PABG_05875	hydroxyacylglutathione hydrolase	C-compound and carbohydrate metabolism	cytoplasmic
PABG_01388	glucosamine-fructose-6-phosphate aminotransferase	C-compound and carbohydrate metabolism	Integral membrane protein
PABG_01280	L-threonine 3-dehydrogenase	C-compound and carbohydrate metabolism	cytoplasmic
PABG_06594	nodulation protein L	C-compound and carbohydrate metabolism	mitochondrial
PABG_06684	alcohol dehydrogenase	C-compound and carbohydrate metabolism	cytoplasmic
PABG_03558	mannose-6-phosphate isomerase	C-compound and carbohydrate metabolism	Cytoplasmic and nuclear
PABG_04616	polysaccharide deacetylase family protein	polysaccharide metabolism	secreted
PABG_00828	actin polymerization protein Bzz1	polysaccharide metabolism	nuclear
PABG_00889	polysaccharide deacetylase	polysaccharide metabolism	secreted
PABG_06951	Arp2/3 complex subunit Arc16	polysaccharide metabolism	cytoplasmic
PABG_01538	alpha-mannosidase	polysaccharide metabolism	mitochondrial
PABG_05883	N-acetylmuramoyl-L-alanine amidase	peptidoglycan metabolism	mitochondrial and secreted
PABG_04685	leukotriene A-4 hydrolase	lipid, fatty acid and isoprenoid metabolism	mitochondrial
PABG_00427	trans-2-enoyl-CoA reductase [Paracoccidioides brasiliensis Pb03]	lipid, fatty acid and isoprenoid metabolism	cytoplasmic
PABG_02636	palmitoyltransferase pfa3	lipid, fatty acid and isoprenoid metabolism	Plasma membrane-bound
PABG_02784	phosphatidylinositol-4-phosphate 5-kinase fab1	lipid, fatty acid and isoprenoid metabolism	mitochondrial
PABG_05236	hydroxymethylglutaryl-CoA lyase	lipid, fatty acid and isoprenoid metabolism	mitochondrial
PABG_05741	palmitoyltransferase erf2	lipid, fatty acid and isoprenoid metabolism	Integral membrane protein
PABG_05904	2-isopropylmalate synthase	lipid, fatty acid and isoprenoid metabolism	cytoplasmic
PABG_03984	lanosterol synthase	lipid, fatty acid and isoprenoid metabolism	cytoplasmic
PABG_02158	fatty acid synthase	lipid, fatty acid and isoprenoid metabolism	Integral membrane protein
PABG_03594	enoyl-(acyl-carrier-protein) reductase	lipid, fatty acid and isoprenoid metabolism	mitochondrial
PABG_05003	N-acetylglucosaminyl-phosphatidylinositol de-N-acetylase	phospholipid metabolism	integral membrane protein and secreted
PABG_00438	fatty acid synthase S-acetyltransferase	fatty acid metabolism	cytoplasmic
PABG_04115	GTP cyclohydrolase I	biosynthesis of vitamins, cofactors, and prosthetic groups	nuclear
PABG_06592	delta-aminolevulinic acid dehydratase	biosynthesis of vitamins, cofactors, and prosthetic groups	cytoplasmic
PABG_03556	GTP cyclohydrolase-2	biosynthesis of vitamins, cofactors, and prosthetic groups	mitochondrial and nuclear
PABG_04700	isochorismatase family protein	secondary metabolism	cytoplasmic
PABG_04505	metallo-beta-lactamase domain-containing protein [Paracoccidioides brasiliensis Pb03]	secondary metabolism	mitochondrial
PABG_03902	isochorismatase family hydrolase, putative	secondary metabolism	cytoplasmic
PABG_00699	beta-lactamase domain-containing protein [Paracoccidioides brasiliensis Pb03]	secondary metabolism	cytoplasmic
PABG_01964	beta-lactamase domain-containing protein [Paracoccidioides brasiliensis Pb03]	secondary metabolism	cytoplasmic
PABG_04067	histidinol dehydrogenase	secondary metabolism	nuclear
PABG_07698	3-dehydroshikimate dehydratase	metabolism of derivatives of dehydroquinic acid, shikimic acid and chorismic acid	mitochondrial
PABG_03096	diphthamide biosynthesis protein	metabolism of secondary products derived from L-lysine, L-arginine and L-histidine	Cytoplasmic and nuclear
PABG_00959	penicillopepsin	extracellular protein degradation	secreted
PABG_06552	fructose-bisphosphate aldolase	glycolysis and gluconeogenesis	cytoplasmic
PABG_03162	fructose-1,6-bisphosphatase	glycolysis and gluconeogenesis	cytoplasmic
PABG_02260	fructose-bisphosphate aldolase	glycolysis and gluconeogenesis	cytoplasmic
PABG_01498	pyruvate carboxylase	glycolysis and gluconeogenesis	cytoplasmic
PABG_01457	enolase	glycolysis and gluconeogenesis	cytoplasmic
PABG_05559	negative regulation of gluconeogenesis	regulation of glycolysis and gluconeogenesis	nuclear
PABG_01299	RMND5A protein	regulation of glycolysis and gluconeogenesis	cytoplasmic
PABG_03685	ribulose-phosphate 3-epimerase	pentose-phosphate pathway non oxidative branch	cytoplasmic
PABG_07317	citrate synthase [Paracoccidioides brasiliensis Pb03]	tricarboxylic-acid pathway (citrate cycle, Krebs cycle, TCA cycle)	mitochondrial
PABG_04594	ATP-citrate synthase	tricarboxylic-acid pathway (citrate cycle, Krebs cycle, TCA cycle)	mitochondrial
PABG_02388	class II aldolase/adducin domain-containing protein	tricarboxylic-acid pathway (citrate cycle, Krebs cycle, TCA cycle)	Cytoplasmic and nuclear
PABG_07324	cytochrome b-c1 complex subunit 2 [Paracoccidioides brasiliensis Pb03]	electron transport and membrane-associated energy conservation	mitochondrial
PABG_00336	NADH-ubiquinone oxidoreductase [Paracoccidioides brasiliensis Pb03]	electron transport and membrane-associated energy conservation	Mitochondrial
PABG_01082	cytochrome c oxidase polypeptide IV	electron transport and membrane-associated energy conservation	mitochondrial
PABG_05029	ATPase	electron transport and membrane-associated energy conservation	nuclear
PABG_01188	quinone oxidoreductase [Paracoccidioides brasiliensis Pb03]	regulation of electron transport and membrane-associated energy conservation	Cytoplasmic
PABG_04877	quinone oxidoreductase	regulation of electron transport and membrane-associated energy conservation	cytoplasmic
PABG_06389	quinone oxidoreductase	regulation of electron transport and membrane-associated energy conservation	cytoplasmic
PABG_03833	ATP-dependent helicase NAM7	DNA processing	nuclear
PABG_02595	PHD and RING finger domain-containing protein	DNA processing	nuclear
PABG_02599	nucleus protein	DNA processing	nuclear
PABG_00011	replication factor C subunit 3	DNA synthesis and replication	nuclear
PABG_06949	replication factor C subunit 4	DNA synthesis and replication	cytoplasmic
PABG_03371	origin recognition complex subunit 1	DNA synthesis and replication	Cytoplasmic and nuclear
PABG_01561	replication factor C subunit 4	DNA synthesis and replication	mitochondrial
PABG_05190	chromosome transmission fidelity protein	DNA synthesis and replication	cytoplasmic and nuclear
PABG_05207	replication factor C subunit 1	DNA synthesis and replication	nuclear
PABG_06388	replication protein A 70 kDa DNA-binding subunit	DNA synthesis and replication	cytoplasmic and nuclear
PABG_04167	DNA mismatch repair protein	DNA recombination and DNA repair	Cytoplasmic and nuclear
PABG_03512	RING-15 protein [Paracoccidioides brasiliensis Pb03]	DNA repair	nuclear
PABG_02611	postreplication repair E3 ubiquitin-protein ligase rad18	DNA repair	nuclear
PABG_07612	double-strand break repair protein mus-23	DNA repair	nuclear
PABG_00040	suppressor protein of bem1/bed5 double mutants	DNA repair	nuclear
PABG_04418	DNA repair protein RAD5	DNA repair	nuclear
PABG_03130	DNA-dependent ATPase MGS1	DNA repair	nuclear
PABG_05007	DNA repair protein rad5	DNA repair	nuclear
PABG_03614	DNA repair protein Nse1	DNA repair	nuclear
PABG_01626	DNA repair protein rad8	DNA repair	Plasma membrane-bound
PABG_06702	DNA repair and transcription factor Ada	DNA repair	mitochondrial
PABG_01244	DNA repair protein RAD14	DNA repair	nuclear
PABG_01746	DNA-(apurinic or apyrimidinic site) lyase	DNA repair	nuclear
PABG_01236	NAD-dependent deacetylase sirtuin-2	DNA restriction or modification	Cytoplasmic and nuclear
PABG_07651	histone deacetylase HosB [Paracoccidioides brasiliensis Pb03]	DNA conformation modification (e.g. chromatin)	nuclear
PABG_07131	histone acetyltransferase ESA1 [Paracoccidioides brasiliensis Pb03]	DNA conformation modification (e.g. chromatin)	cytoplasmic
PABG_01037	histone deacetylase	DNA conformation modification (e.g. chromatin)	nuclear
PABG_01044	MIZ zinc finger protein	DNA conformation modification (e.g. chromatin)	nuclear
PABG_01095	histone deacetylase	DNA conformation modification (e.g. chromatin)	nuclear
PABG_00467	histone H3 methyltransferase Clr4	DNA conformation modification (e.g. chromatin)	nuclear
PABG_03150	histone acetyltransferase ESA1	DNA conformation modification (e.g. chromatin)	nuclear
PABG_03250	NAD-dependent histone deacetylase SIR2	DNA conformation modification (e.g. chromatin)	nuclear
PABG_03352	Sir2 family histone deacetylase Hst4	DNA conformation modification (e.g. chromatin)	nuclear
PABG_04770	histone acetyltransferase ESA1	DNA conformation modification (e.g. chromatin)	nuclear
PABG_07200	RSC complex subunit Sfh1	DNA conformation modification (e.g. chromatin)	mitochondrial
PABG_05592	meiotically up-regulated gene 185 protein	mitotic cell cycle and cell cycle control	nuclear
PABG_05381	FACT complex subunit spt16	mitotic cell cycle and cell cycle control	Cytoplasmic
PABG_00314	asparagine-rich protein	mitotic cell cycle and cell cycle control	mitochondrial
PABG_06258	negative regulator of the PHO system	mitotic cell cycle and cell cycle control	nuclear
PABG_05022	cell division cycle protein	mitotic cell cycle and cell cycle control	nuclear
PABG_00786	Mob1 family protein	mitotic cell cycle and cell cycle control	nuclear
PABG_02163	cell division cycle protein	mitotic cell cycle and cell cycle control	nuclear
PABG_02045	ARF GTPase activating protein	mitotic cell cycle and cell cycle control	secreted
PABG_01523	cell division control protein	mitotic cell cycle and cell cycle control	secreted
PABG_06450	Cut9-interacting protein scn1	mitotic cell cycle and cell cycle control	nuclear
PABG_01008	metaphase-anaphase transition protein	mitotic cell cycle and cell cycle control	nuclear
PABG_05227	maintenance of ploidy protein MOB2	mitotic cell cycle and cell cycle control	mitochondrial and nuclear
PABG_04448	meiosis specific protein Hop1	meiosis	nuclear
PABG_02417	chromosome segregation protein	chromosome segregation/division	nuclear
PABG_07325	RNA polymerase III subunit RPC82	RNA synthesis	nuclear
PABG_07664	Fungal Zn binuclear cluster domain containing protein	RNA synthesis	nuclear
PABG_07000	DNA-directed RNA polymerases I/II/III subunit 10	RNA synthesis	mitochondrial
PABG_07088	DNA-directed RNA polymerase III subunit RPC1	RNA synthesis	cytoplasmic and nuclear
PABG_04775	DNA-directed RNA polymerase i 13.7 kda polypeptide	RNA synthesis	nuclear
PABG_02282	DNA-directed RNA polymerases III 12.5 kDa polypeptide	RNA synthesis	mitochondrial
PABG_02435	DNA-directed RNA polymerase I subunit RPA1	RNA synthesis	Cytoplasmic and nuclear
PABG_06473	WD repeat-containing protein	RNA synthesis	nuclear
PABG_06609	WD domain-containing protein	RNA synthesis	mitochondrial
PABG_02328	branchpoint-bridging protein	RNA synthesis	nuclear
PABG_00902	HIT finger domain-containing protein	tRNA synthesis	nuclear
PABG_02079	tRNA-specific adenosine deaminase	tRNA synthesis	nuclear
PABG_06932	leucyl-tRNA synthetase	tRNA synthesis	mitochondrial
PABG_06128	endoribonuclease ysh1	mRNA synthesis	cytoplasmic and nuclear
PABG_05980	DNA-directed RNA polymerase II subunit RPB1	mRNA synthesis	nuclear
PABG_05583	transcription elongation factor	general transcription activities	Nuclear
PABG_00327	zinc finger protein	general transcription activities	Mitochondrial
PABG_07240	DNA-directed RNA polymerase II, putative	general transcription activities	nuclear
PABG_07246	transcription initiation factor IIE subunit alpha	general transcription activities	nuclear
PABG_01130	DNA-directed RNA polymerase II subunit RPB2	general transcription activities	nuclear
PABG_02810	ZZ type zinc finger protein	general transcription activities	nuclear
PABG_03787	transcription elongation factor S-II	general transcription activities	nuclear
PABG_06500	transcriptional activator	transcription initiation	nuclear
PABG_02277	transcription initiation factor IIB	transcription initiation	Cytoplasmic
PABG_02396	homeobox and C2H2 transcription factor	transcription initiation	nuclear
PABG_00137	transcription initiation factor TFIId 127kD subunit	transcription initiation	nuclear
PABG_04695	RING finger domain-containing protein	transcriptional control	Nuclear
PABG_07689	RING finger protein	transcriptional control	nuclear
PABG_04642	C6 zinc finger domain-containing protein	transcriptional control	nuclear
PABG_00021	histone deacetylase HdaA	transcriptional control	nuclear
PABG_05394	MIZ zinc finger protein	transcriptional control	nuclear
PABG_07803	cutinase transcription factor 1 alpha	transcriptional control	nuclear
PABG_07838	PHD finger domain-containing protein	transcriptional control	nuclear
PABG_07413	CHY zinc finger domain-containing protein	transcriptional control	nuclear
PABG_07429	copper fist DNA binding domain-containing protein	transcriptional control	nuclear
PABG_07741	L-azetidine-2-carboxylic acid acetyltransferase	transcriptional control	mitochondrial
PABG_00345	C6 finger domain-containing protein	transcriptional control	nuclear
PABG_05434	fungal specific transcription factor domain-containing protein	transcriptional control	nuclear
PABG_05542	C6 zinc finger domain-containing protein	transcriptional control	nuclear
PABG_02440	C2H2 transcription factor (Rpn4)	transcriptional control	nuclear
PABG_02943	C6 transcription factor (AmyR) [Paracoccidioides brasiliensis Pb03]	transcriptional control	nuclear
PABG_02981	chromodomain-helicase-DNA-binding protein	transcriptional control	nuclear
PABG_03020	CCCH zinc finger and SMR domain-containing protein	transcriptional control	nuclear
PABG_03064	cutinase gene palindrome-binding protein	transcriptional control	Cytoplasmic and nuclear
PABG_01034	C6 transcription factor	transcriptional control	nuclear
PABG_01118	C6 transcription factor	transcriptional control	nuclear
PABG_01133	C6 transcription factor	transcriptional control	nuclear
PABG_02626	C2H2 type zinc finger containing protein	transcriptional control	nuclear
PABG_02664	C6 finger domain-containing protein	transcriptional control	nuclear
PABG_02822	PHD finger and SET domain-containing protein	transcriptional control	nuclear
PABG_02841	transcriptional regulatory protein pro1	transcriptional control	nuclear
PABG_02861	transcriptional adapter 2	transcriptional control	nuclear
PABG_06569	C2H2 finger domain-containing protein	transcriptional control	nuclear
PABG_06491	C2HC5 finger protein	transcriptional control	nuclear
PABG_05830	GATA-type sexual development transcription factor NsdD	transcriptional control	nuclear
PABG_05739	C6 transcription factor	transcriptional control	nuclear
PABG_05639	ZZ type zinc finger domain-containing protein	transcriptional control	nuclear
PABG_06145	PHD finger and BAH domain-containing protein	transcriptional control	nuclear
PABG_06313	acetamidase regulatory protein	transcriptional control	nuclear
PABG_06072	C6 transcription factor	transcriptional control	nuclear
PABG_04503	C2H2 finger domain-containing protein	transcriptional control	nuclear
PABG_04552	fungal specific transcription factor domain-containing protein	transcriptional control	nuclear
PABG_04612	zinc finger protein zpr1	transcriptional control	nuclear
PABG_00059	C2H2 finger domain-containing protein	transcriptional control	nuclear
PABG_00067	CCCH zinc finger protein	transcriptional control	nuclear
PABG_00123	RING finger protein	transcriptional control	secreted
PABG_00249	zinc finger protein gcs1	transcriptional control	cytoplasmic
PABG_04172	RING finger domain-containing protein	transcriptional control	nuclear
PABG_04198	fungal specific transcription factor domain-containing protein	transcriptional control	Cytoplasmic and nuclear
PABG_04235	acetate regulatory DNA binding protein FacB	transcriptional control	nuclear
PABG_04270	C2H2 finger domain-containing protein	transcriptional control	nuclear
PABG_04368	ring finger protein 14	transcriptional control	nuclear
PABG_03910	transcriptional regulator Cti6	transcriptional control	nuclear
PABG_04080	PHD transcription factor	transcriptional control	nuclear
PABG_00737	C6 finger domain-containing protein	transcriptional control	nuclear
PABG_00796	C6 finger domain-containing protein	transcriptional control	nuclear
PABG_00941	TRAF-type zinc finger protein	transcriptional control	nuclear
PABG_00975	C2H2 type zinc finger containing protein	transcriptional control	nuclear
PABG_00523	jumonji family transcription factor	transcriptional control	nuclear
PABG_00538	PHD finger domain protein	transcriptional control	nuclear
PABG_07015	C6 transcription factor	transcriptional control	nuclear
PABG_07018	CCCH zinc finger domain-containing protein	transcriptional control	nuclear
PABG_07099	C6 transcription factor	transcriptional control	nuclear
PABG_06960	C2H2 finger domain transcription factor	transcriptional control	nuclear
PABG_06970	gastrula zinc finger protein	transcriptional control	nuclear
PABG_03262	C6 transcription factor Prf	transcriptional control	nuclear
PABG_03297	C6 transcription factor	transcriptional control	nuclear
PABG_04741	SAGA complex component Sgf73	transcriptional control	Nuclear
PABG_04832	C6 zinc finger domain-containing protein	transcriptional control	nuclear
PABG_04857	GATA factor SREP	transcriptional control	nuclear
PABG_04965	MYND domain protein (SamB)	transcriptional control	nuclear
PABG_05885	GATA transcription factor	transcriptional control	nuclear
PABG_05848	RING finger domain-containing protein	transcriptional control	nuclear
PABG_02082	zinc finger transcription factor 1	transcriptional control	nuclear
PABG_02130	RING finger protein	transcriptional control	nuclear
PABG_02294	PHD transcription factor	transcriptional control	nuclear
PABG_02393	GRF zinc finger domain-containing protein	transcriptional control	nuclear
PABG_02404	fungal specific transcription factor domain containing protein	transcriptional control	Plasma membrane-bound
PABG_02418	C2H2 finger domain-containing protein	transcriptional control	nuclear
PABG_02019	zinc finger protein	transcriptional control	nuclear
PABG_01422	transcription factor IIIA	transcriptional control	nuclear
PABG_01342	cutinase transcription factor 1	transcriptional control	nuclear
PABG_01242	JmjC domain-containing histone demethylation protein	transcriptional control	nuclear
PABG_01734	DNL zinc finger domain-containing protein	transcriptional control	nuclear
PABG_01797	DBF zinc finger domain-containing protein	transcriptional control	nuclear
PABG_01876	C6 transcription factor	transcriptional control	nuclear
PABG_05156	RING finger domain-containing protein	transcriptional control	nuclear
PABG_05322	GATA type zinc finger protein Asd4	transcriptional control	nuclear
PABG_06059	C6 transcription factor	transcriptional control	nuclear
PABG_06127	PHD finger domain-containing protein	transcriptional control	nuclear
PABG_06361	C6 finger domain protein, putative	transcriptional control	nuclear
PABG_06777	copper-activated transcription factor grisea	transcriptional control	nuclear
PABG_07523	C6 transcription factor OefC	transcriptional control	nuclear
PABG_00032	C6 zinc finger domain-containing protein	transcriptional control	nuclear
PABG_00715	C2H2 transcription factor	transcriptional control	nuclear
PABG_01031	Zn(II)2Cys6 transcriptional activator	transcriptional control	nuclear
PABG_01796	C6 finger domain-containing protein	transcriptional control	nuclear
PABG_01975	fungal specific transcription factor domain-containing protein	transcriptional control	nuclear
PABG_02378	fungal specific transcription factor domain-containing protein	transcriptional control	nuclear
PABG_03226	C6 finger domain-containing protein	transcriptional control	nuclear
PABG_03227	U1 zinc finger domain-containing protein	transcriptional control	nuclear
PABG_03670	C6 finger domain-containing protein	transcriptional control	nuclear
PABG_03786	C6 transcription factor	transcriptional control	nuclear
PABG_04941	C6 transcription factor (NirA)	transcriptional control	nuclear
PABG_05011	C3HC4 type zinc finger containing protein	transcriptional control	nuclear
PABG_05098	C6 zinc finger domain-containing protein	transcriptional control	nuclear
PABG_05313	RING finger domain protein	transcriptional control	nuclear
PABG_05336	CCCH zinc finger and RRM domain-containing protein	transcriptional control	nuclear
PABG_05409	C6 transcription factor	transcriptional control	nuclear
PABG_05622	GATA-factor	transcription activation	Nuclear
PABG_03829	fungal specific transcription factor domain-containing protein	transcription activation	Integral membrane protein
PABG_00794	transcriptional activator protein	transcription activation	nuclear
PABG_00562	leupaxin	transcription activation	nuclear
PABG_03236	metallothionein-I transcription activator	transcription activation	mitochondrial
PABG_07414	C3HC zinc finger domain-containing protein	transcriptional control	nuclear
PABG_04075	tRNA-guanine transglycosylase family protein	tRNA processing	nuclear
PABG_06938	tRNA modification GTPase mss1	tRNA processing	cytoplasmic and nuclear
PABG_05470	RNA splicing factor PRP9	splicing	nuclear
PABG_01102	splicing factor U2af 38 kDa subunit	splicing	nuclear
PABG_02591	pre-mRNA splicing factor ini1	splicing	nuclear
PABG_00271	pre-mRNA-splicing factor cwc24	splicing	nuclear
PABG_07420	IBR domain-containing protein	Regulation of splicing	nuclear
PABG_03578	IBR domain-containing protein	Regulation of splicing	nuclear
PABG_01273	HIT finger domain-containing protein	Regulation of splicing	nuclear
PABG_01666	HIT finger domain-containing protein	Regulation of splicing	nuclear
PABG_06223	mRNA 3'-end-processing protein yth1	3'-end processing	mitochondrial and nuclear
PABG_07788	queuine tRNA-ribosyltransferase	tRNA modification	mitochondrial
PABG_06964	tRNA isopentenyltransferase	tRNA modification	mitochondrial
PABG_06649	ribosome biogenesis ATPase RIX7	ribosome biogenesis	cytoplasmic
PABG_06724	large-subunit GTPase	ribosome biogenesis	nuclear
PABG_05714	40S ribosomal protein S27	ribosomal proteins	mitochondrial
PABG_01596	eukaryotic translation initiation factor 2 subunit beta	translation initiation	nuclear
PABG_07459	translation initiation factor IF-2 [Paracoccidioides brasiliensis Pb03]	translation initiation	nuclear
PABG_04735	eukaryotic translation initiation factor 5	translation initiation	nuclear
PABG_05580	seryl-tRNA synthetase	aminoacyl-tRNA-synthetases	cytoplasmic
PABG_07656	isoleucyl-tRNA synthetase	aminoacyl-tRNA-synthetases	mitochondrial
PABG_05532	glycyl-tRNA synthetase	aminoacyl-tRNA-synthetases	cytoplasmic and nuclear
PABG_02486	seryl-tRNA synthetase synthetase	aminoacyl-tRNA-synthetases	mitochondrial
PABG_06071	threonyl-tRNA synthetase	aminoacyl-tRNA-synthetases	cytoplasmic
PABG_04551	threonyl-tRNA synthetase	aminoacyl-tRNA-synthetases	Cytoplasmic and nuclear
PABG_00966	prolyl-tRNA synthetase	aminoacyl-tRNA-synthetases	cytoplasmic
PABG_00500	prolyl-tRNA synthetase	aminoacyl-tRNA-synthetases	cytoplasmic
PABG_03816	alanyl-tRNA synthetase	aminoacyl-tRNA-synthetases	cytoplasmic
PABG_01508	methionyl-tRNA synthetase	aminoacyl-tRNA-synthetases	mitochondrial
PABG_06626	methionyl-tRNA synthetase	aminoacyl-tRNA-synthetases	cytoplasmic
PABG_07264	chaperone protein dnaJ	protein folding and stabilization	Endoplasmic reticulum and secreted
PABG_02648	chaperone protein dnaJ	protein folding and stabilization	cytoplasmic
PABG_07806	ATPase family AAA domain-containing protein 1-B [Paracoccidioides brasiliensis Pb03]	protein targeting, sorting and translocation	cytoplasmic and nuclear
PABG_07143	vacuolar protein sorting-associated protein	protein targeting, sorting and translocation	cytoplasmic
PABG_05257	ATPase family AAA domain-containing protein	protein targeting, sorting and translocation	nuclear
PABG_00818	mitochondrial import inner membrane translocase subunit tim9	protein targeting, sorting and translocation	nuclear
PABG_01898	AAA family ATPase	protein targeting, sorting and translocation	mitochondrial
PABG_01468	AAA family ATPase	protein targeting, sorting and translocation	nuclear
PABG_01434	mitochondrial protein import protein MAS5	protein targeting, sorting and translocation	cytoplasmic
PABG_01828	vacuolar protein sorting-associated protein	protein targeting, sorting and translocation	Cytoplasmic and nuclear
PABG_05086	AAA family ATPase	protein targeting, sorting and translocation	nuclear
PABG_05135	mitochondrial import inner membrane translocase subunit tim13	protein targeting, sorting and translocation	mitochondrial
PABG_05988	AAA family ATPase	protein targeting, sorting and translocation	mitochondrial
PABG_07708	vacuolar protein-sorting-associated protein	protein targeting, sorting and translocation	mitochondrial
PABG_04672	palmitoyltransferase akr1	protein modification	Integral membrane protein
PABG_01725	ADP-ribosylation factor	protein modification	mitochondrial
PABG_01326	geranylgeranyltransferase type I	modification with fatty acids (e.g. myristylation, palmitylation, farnesylation)	mitochondrial
PABG_03893	palmitoyltransferase pfa5	modification with fatty acids (e.g. myristylation, palmitylation, farnesylation)	Integral membrane protein
PABG_06046	phosphatase 2c	modification by phosphorylation, dephosphorylation, autophosphorylation	nuclear
PABG_05902	ser/Thr protein phosphatase family	modification by phosphorylation, dephosphorylation, autophosphorylation	secreted
PABG_07608	serine/threonine-protein phosphatase PP-V	modification by phosphorylation, dephosphorylation, autophosphorylation	cytoplasmic and nuclear
PABG_04199	casein kinase II subunit beta	modification by phosphorylation, dephosphorylation, autophosphorylation	cytoplasmic
PABG_04393	GPI ethanolamine phosphate transferase	modification by phosphorylation, dephosphorylation, autophosphorylation	Plasma membrane-bound
PABG_03882	Ser/Thr protein phosphatase family protein	modification by phosphorylation, dephosphorylation, autophosphorylation	mitochondrial
PABG_03294	casein kinase II subunit beta	modification by phosphorylation, dephosphorylation, autophosphorylation	Cytoplasmic and nuclear
PABG_05834	protein phosphatase 1A	modification by phosphorylation, dephosphorylation, autophosphorylation	nuclear
PABG_02114	ser/Thr protein phosphatase family protein	modification by phosphorylation, dephosphorylation, autophosphorylation	Cytoplasmic and nuclear
PABG_03593	ser/Thr protein phosphatase family protein	modification by phosphorylation, dephosphorylation, autophosphorylation	secreted
PABG_06737	serine/threonine-protein phosphatase PP1	modification by phosphorylation, dephosphorylation, autophosphorylation	cytoplasmic
PABG_07840	serine/threonine-protein phosphatase PP-Z	modification by phosphorylation, dephosphorylation, autophosphorylation	nuclear
PABG_04934	calcium-independent protein kinase C	modification by phosphorylation, dephosphorylation, autophosphorylation	Cytoplasmic and nuclear
PABG_00004	MATH and UCH domain-containing protein	modification by ubiquitination, deubiquitination	nuclear
PABG_01228	endosome-associated ubiquitin isopeptidase (AmsH) [Paracoccidioides brasiliensis Pb03]	modification by ubiquitination, deubiquitination	nuclear
PABG_05553	RING-box protein	modification by ubiquitination, deubiquitination	cytoplasmic
PABG_04511	adiadne-1	modification by ubiquitination, deubiquitination	nuclear
PABG_04589	NEDD8-activating enzyme E1 regulatory subunit	modification by ubiquitination, deubiquitination	Integral membrane protein and Plasma membrane
PABG_06905	E3 ubiquitin-protein ligase BRE1	modification by ubiquitination, deubiquitination	nuclear
PABG_01706	E3 ubiquitin-protein ligase ubr11	modification by ubiquitination, deubiquitination	Cytoplasmic and nuclear
PABG_06387	ubiquitin carboxyl-terminal hydrolase	modification by ubiquitination, deubiquitination	nuclear
PABG_00631	glutaminyl-peptide cyclotransferase	posttranslational modification of amino acids (e.g. hydroxylation, methylation)	secreted
PABG_07703	Lamina-associated polypeptide 2	protein processing (proteolytic)	secreted
PABG_02798	methionine aminopeptidase 1A	protein processing (proteolytic)	cytoplasmic
PABG_05961	mitochondrial-processing peptidase subunit beta	protein processing (proteolytic)	mitochondrial
PABG_01686	mitochondrial intermediate peptidase	protein processing (proteolytic)	nuclear
PABG_02506	mitochondrial chaperone BCS1	protein processing (non-proteolytic, e.g. iron-incorporation)	Cytoplasmic and nuclear
PABG_02605	peroxisome assembly protein	assembly of protein complexes	cytoplasmic
PABG_00509	mitochondrial chaperone BCS1	assembly of protein complexes	Mitochondrial and cytoplasmic
PABG_04690	mast cell carboxypeptidase A	protein/peptide degradation	secreted
PABG_05602	beta-Ala-His dipeptidase	protein/peptide degradation	cytoplasmic
PABG_03422	mitochondrial-processing peptidase subunit alpha [Paracoccidioides brasiliensis Pb03]	protein/peptide degradation	mitochondrial
PABG_07533	methionine aminopeptidase [Paracoccidioides brasiliensis Pb03]	protein/peptide degradation	cytoplasmic
PABG_07548	pepsin A [Paracoccidioides brasiliensis Pb03]	protein/peptide degradation	secreted
PABG_07197	dipeptidyl-peptidase	protein/peptide degradation	mitochondrial
PABG_07230	xaa-Pro aminopeptidase I	protein/peptide degradation	nuclear and mitochondrial
PABG_05506	xaa-Pro dipeptidase	protein/peptide degradation	cytoplasmic
PABG_03073	M6 family metalloprotease	protein/peptide degradation	secreted
PABG_06271	glycoprotease pgp1	protein/peptide degradation	cytoplasmic
PABG_06327	N-acetylated-alpha-linked acidic dipeptidase	protein/peptide degradation	secreted
PABG_05921	xaa-Pro aminopeptidase I	protein/peptide degradation	cytoplasmic and nuclear
PABG_00030	insulin-degrading enzyme	protein/peptide degradation	cytoplasmic
PABG_00234	26S protease regulatory subunit 4	protein/peptide degradation	nuclear
PABG_00772	thimet oligopeptidase	protein/peptide degradation	mitochondrial
PABG_00784	ATP-dependent protease La	protein/peptide degradation	mitochondrial
PABG_00710	aminopeptidase	protein/peptide degradation	Mitochondrial and cytoplasmic
PABG_06884	O-sialoglycoprotein endopeptidase	protein/peptide degradation	cytoplasmic
PABG_06947	candidapepsin	protein/peptide degradation	secreted
PABG_03199	proteasome-activating nucleotidase	protein/peptide degradation	cytoplasmic and mitochondrial
PABG_03377	dipeptidase	protein/peptide degradation	Integral membrane protein. Mitochondrial inner membrane
PABG_04913	ATP-dependent protease La	protein/peptide degradation	cytoplasmic
PABG_02109	peptidase family M28 family	protein/peptide degradation	Integral membrane protein
PABG_02276	N-acetylated-alpha-linked acidic dipeptidase	protein/peptide degradation	Cytoplasmic
PABG_02362	24 kDa metalloproteinase	protein/peptide degradation	secreted
PABG_01566	aminopeptidase	protein/peptide degradation	secreted
PABG_01556	aspartyl aminopeptidase	protein/peptide degradation	mitochondrial
PABG_01517	mitochondrial presequence protease	protein/peptide degradation	mitochondrial
PABG_01484	metallopeptidase	protein/peptide degradation	Cytoplasmic and nuclear
PABG_01483	CaaX prenyl protease	protein/peptide degradation	Integral membrane protein
PABG_01771	pre-60S factor REI1	protein/peptide degradation	nuclear
PABG_01779	WD repeat-containing protein	protein/peptide degradation	cytoplsmic and nuclear
PABG_01798	xaa-pro dipeptidase	protein/peptide degradation	mitochondrial
PABG_06974	aminopeptidase N	protein/peptide degradation	mitochondrial
PABG_07365	N-acetylated-alpha-linked acidic dipeptidase	protein/peptide degradation	cytoplasmic and secreted
PABG_05217	a-pheromone processing metallopeptidase Ste23	protein/peptide degradation	Nuclear and cytoplasmic
PABG_01036	26S proteasome regulatory subunit RPN11	proteasomal degradation (ubiquitin/proteasomal pathway)	cytoplasmic
PABG_02229	26S protease regulatory subunit 6B	proteasomal degradation (ubiquitin/proteasomal pathway)	nuclear
PABG_01916	26S protease regulatory subunit 8 [Paracoccidioides brasiliensis Pb03]	proteasomal degradation (ubiquitin/proteasomal pathway)	nuclear
PABG_03773	26S protease regulatory subunit 7	proteasomal degradation (ubiquitin/proteasomal pathway)	Cytoplasmic and nuclear
PABG_01458	26S protease regulatory subunit S10B	proteasomal degradation (ubiquitin/proteasomal pathway)	Cytoplasmic and nuclear
PABG_00954	ubiquitin conjugating enzyme	proteasomal degradation (ubiquitin/proteasomal pathway)	nuclear
PABG_02198	26S protease regulatory subunit 6A	proteasomal degradation (ubiquitin/proteasomal pathway)	Cytoplasmic and nuclear
PABG_04011	aspartyl aminopeptidase	lysosomal and vacuolar protein degradation	cytoplasmic
PABG_02231	vacuolar protease A	lysosomal and vacuolar protein degradation	cytoplasmic
PABG_02736	IBR domain-containing protein	protein binding	mitochondrial
PABG_00823	LIM domain-containing protein	protein binding	nuclear
PABG_00339	nucleolar protein NOP2	nucleic acid binding	nuclear
PABG_05371	DNA-binding protein HEXBP	DNA binding	nuclear
PABG_02545	MYB DNA-binding domain-containing protein	DNA binding	Cytoplasmic and nuclear
PABG_01158	zinc knuckle domain-containing protein	DNA binding	nuclear
PABG_02684	RNA-binding protein	RNA binding	nuclear
PABG_04010	RNA-binding protein NOB1	RNA binding	nuclear
PABG_06141	FYVE domain-containing protein	lipid binding	nuclear
PABG_06232	zinc ion binding protein	metal binding	cytoplasmic and nuclear
PABG_02800	EF hand domain-containing protein	calcium binding	mitochondrial
PABG_04476	HIT domain protein	nucleotide/nucleoside/nucleobase binding	nuclear
PABG_03257	HIT domain-containing protein	nucleotide/nucleoside/nucleobase binding	mitochondrial
PABG_06991	GTP cyclohydrolase	GTP binding	cytoplasmic
PABG_02905	GTP-binding protein 128up	GTP binding	cytoplasmic
PABG_04450	GTP-binding protein	GTP binding	mitochondrial
PABG_04241	GTP-binding protein	GTP binding	cytoplasmic
PABG_03886	mitochondrial GTPase	GTP binding	mitochondrial
PABG_00697	nucleolar GTP-binding protein	GTP binding	nuclear
PABG_03284	GTP-dependent nucleic acid-binding protein engD	GTP binding	cytoplasmic
PABG_03354	nucleolar GTP-binding protein	GTP binding	mitochondrial and nuclear
PABG_02399	mitochondrial GTPase	GTP binding	Mitochondrial matrix
PABG_06741	GTP-binding protein	GTP binding	cytoplasmic and nuclear
PABG_07219	JmjC domain-containing protein	Regulator of transcription factor	nuclear
PABG_04697	ZIP metal ion transporter	ion transport	Integral membrane protein
PABG_07467	zinc transporter 1	ion transport	cytoplasmic and integral membrane protein
PABG_05498	zinc transporter protein	ion transport	Integral membrane protein
PABG_02495	copper-transporting P-type ATPase	ion transport	Plasma membrane protein
PABG_03057	copper-transporting ATPase	ion transport	Plasma membrane protein
PABG_06260	cation efflux family protein	ion transport	mitochondrial
PABG_00033	membrane zinc transporter	ion transport	integral membrane protein
PABG_00847	zinc transporter YKE4	ion transport	Integral membrane protein
PABG_00906	copper-transporting P-type ATPase copA [Paracoccidioides brasiliensis Pb03]	ion transport	Integral membrane protein
PABG_07098	zrt1 protein	ion transport	Integral membrane protein
PABG_07115	CDF zinc transporter	ion transport	Integral membrane protein
PABG_06855	cation diffusion facilitator family transporter	ion transport	Integral membrane protein
PABG_03393	cation efflux family protein family protein [Paracoccidioides brasiliensis Pb03]	ion transport	Integral membrane protein
PABG_02298	ZIP Zinc transporter family protein	ion transport	Integral membrane protein
PABG_05131	zinc transporter SLC39A9	ion transport	Integral membrane protein
PABG_06009	cation diffusion facilitator 1	cation transport (H+, Na+, K+, Ca2+ , NH4+, etc.)	Integral membrane protein
PABG_07725	zinc-regulated transporter 1	heavy metal ion transport (Cu+, Fe3+, etc.)	Integral membrane protein
PABG_05568	mitochondrial import inner membrane translocase subunit TIM8	protein transport	mithocondrial
PABG_06546	zinc-binding oxidoreductase ToxD	electron transport	cytoplasmic
PABG_00101	zinc-binding oxidoreductase	electron transport	cytoplasmic
PABG_05305	oxidoreductase	electron transport	cytoplasmic
PABG_07629	mRNA export protein	RNA transport	nuclear
PABG_04508	katanin p60 ATPase-containing subunit	transport ATPases	Cytoplasmic, nuclear and mitochondrial
PABG_04554	AAA ATPase	transport ATPases	mitochondrial
PABG_01351	AAA family ATPase	transport ATPases	Mitochondrial and nuclear
PABG_02221	arsenite transport subunit A	transport ATPases	cytoplasmic
PABG_03077	RING and UBP finger domain protein	nuclear transport	Cytoplasmic and nuclear
PABG_02478	vesicle-fusing ATPase	vesicular transport (Golgi network, etc.)	cytoplasmic
PABG_06166	transport protein SEC23	vesicular transport (Golgi network, etc.)	Integral membrane protein and mitochondrial
PABG_04617	vacuolar membrane protein PEP5	vesicular transport (Golgi network, etc.)	cytoplasmic and nuclear
PABG_07517	Sec23/Sec24 family protein [Paracoccidioides brasiliensis Pb03]	ER to Golgi transport	cytoplasmic
PABG_04493	transport protein SEC24	ER to Golgi transport	cytoplasmic
PABG_05821	vacuolar segregation protein pep7	vacuolar/lysosomal transport	nuclear
PABG_07673	adenosine deaminase family protein	cellular signalling	cytoplasmic
PABG_04170	dDENN domain-containing protein	cellular signalling	Cytoplasmic and nuclear
PABG_00984	fungal Zn binuclear cluster domain-containing protein	cellular signalling	nuclear
PABG_00434	diploid state maintenance protein chpA	cellular signalling	Cytoplasmic and nuclear
PABG_01412	ARF GTPase activator (Csx2) [Paracoccidioides brasiliensis Pb03]	cellular signalling	nuclear
PABG_01413	high affinity cAMP-specific 3',5'-cyclic phosphodiesterase 7A	cAMP/cGMP mediated signal transduction	nuclear
PABG_00783	chaperone protein dnaJ	stress response	Cytoplasmic and nuclear
PABG_00482	heat shock protein	stress response	Mitochondrial
PABG_02373	heat shock protein	stress response	cytoplasmic
PABG_03742	arsenite resistance protein Ars2	stress response	nuclear
PABG_01885	peptide methionine sulfoxide reductase msrB	stress response	mitochondrial
PABG_05962	NADP-dependent leukotriene B4 12-hydroxydehydrogenase	detoxification	cytoplasmic
PABG_05115	glutathione-dependent formaldehyde-activating	glutathione conjugation reaction	cytoplasmic and mitochondrial
PABG_03954	superoxide dismutase	superoxide metabolism	cytoplasmic
PABG_00431	cytosolic Cu/Zn superoxide dismutase	superoxide metabolism	secreted
PABG_01520	zinc homeostasis factor 1	homeostasis of metal ions (Na, K, Ca etc.)	secreted
PABG_06615	Metal homeostasis factor ATX1	homeostasis of metal ions (Na, K, Ca etc.)	cytoplasmic
PABG_02651	COP9 signalosome complex subunit 5	photoperception and response	Cytoplasmic and nuclear
PABG_05392	GPI ethanolamine phosphate transferase	cell wall	Integral membrane protein
PABG_03843	peroxisome biosynthesis protein (Peroxin-10)	peroxisome	nuclear and mitochondrial
PABG_07692	peroxisome biosynthesis protein PAS1	peroxisome	mitochondrial
PABG_03765	peroxisomal biogenesis factor 6	peroxisome	Cytoplasmic and nuclear
PABG_00879	developmental protein fluG	fungal and other eukaryotic cell type differentiation	Cytoplasmic and nuclear
PABG_03759	rho-GTPase-activating protein LRG1	development of asco- basidio- or zygospore	Cytoplasmic and nuclear
