# Supplementary material for: Predicting copper-, iron-, and zinc-binding proteins in pathogenic species of the Paracoccidioides genus
Source: Front Microbiol. 2015 Jan 9;5:761. doi: 10.3389/fmicb.2014.00761 (PMC4288321; doi:10.3389/fmicb.2014.00761)
Supplement: Supplementary file 3 [file Table3.XLSX]

## Sheet: Copper Pb18
Supplementary Table 3 - Cu, Fe and Zn proteins found in Paracoccidioides spp. isolate Pb18
Pb18 Accession number	Protein description	Functional classification	Localization
PADG_07725	conserved hypothetical protein [Paracoccidioides brasiliensis Pb18]	_	_
PADG_06753	conserved hypothetical protein [Paracoccidioides brasiliensis Pb18]	_	_
PADG_05360	copper amine oxidase [Paracoccidioides brasiliensis Pb18]	aminoacid metabolism	Secreted (extracellular)
PADG_04135	tyrosinase [Paracoccidioides brasiliensis Pb18]	degradation of tyrosine	Secreted (extracellular)
PADG_00088	copper-containing nitrite reductase [Paracoccidioides brasiliensis Pb18]	nitrogen metabolism	Mitochondrial
PADG_06197	xanthine dehydrogenase [Paracoccidioides brasiliensis Pb18]	purin nucleotide/nucleoside/nucleobase metabolism	cytoplasmic
PADG_01660	xanthine dehydrogenase [Paracoccidioides brasiliensis Pb18]	purin nucleotide/nucleoside/nucleobase metabolism	cytoplasmic
PADG_03351	glyoxal oxidase [Paracoccidioides brasiliensis Pb18]	lipid, fatty acid and isoprenoid metabolism	cytoplasmic
PADG_07263	copper amine oxidase [Paracoccidioides brasiliensis Pb18]	metabolism of amines	Cytoplasmic
PADG_03260	copper amine oxidase [Paracoccidioides brasiliensis Pb18]	metabolism of amines	cytoplasmic
PADG_02621	peroxisomal copper amine oxidase [Paracoccidioides brasiliensis Pb18]	metabolism of amines	cytoplasmic
PADG_05994	laccase IV [Paracoccidioides brasiliensis Pb18]	metabolism of melanins	Cytoplasmic and Nuclear
PADG_03184	laccase-1 [Paracoccidioides brasiliensis Pb18]	metabolism of melanins	Secreted (extracellular)
PADG_07092	laccase-1 [Paracoccidioides brasiliensis Pb18]	metabolism of melanins	secreted
PADG_07058	cytochrome c oxidase assembly protein ctaG [Paracoccidioides brasiliensis Pb18]	accessory proteins of electron transport and membrane-associated energy conservation	Mitochondrial
PADG_00042	cytochrome c oxidase copper chaperone	respiration	nuclear
PADG_01124	mitochondrial metallochaperone Sco1 [Paracoccidioides brasiliensis Pb18]	protein processing (non-proteolytic, e.g. iron-incorporation)	Mitochondrial
PADG_00917	copper-sulfate regulated protein [Paracoccidioides brasiliensis Pb18]	ion transport	Plasma membrane-bound
PADG_01582	copper-transporting ATPase [Paracoccidioides brasiliensis Pb18]	ion transport	Plasma membrane-bound
PADG_05084	ctr copper transporter family protein [Paracoccidioides brasiliensis Pb18]	ion transport	Plasma membrane-bound
PADG_04650	low affinity copper transporter [Paracoccidioides brasiliensis Pb18]	ion transport	Plasma membrane-bound
PADG_03376	copper transporting P-type ATPase protein [Paracoccidioides brasiliensis Pb18]	ion transport	Plasma membrane-bound
PADG_04146	Ctr copper transporter family protein	ion transport	Plasma membrane-bound
PADG_07418	superoxide dismutase	superoxide metabolism	cytoplasmic
PADG_02842	Cu/Zn superoxide dismutase [Paracoccidioides brasiliensis Pb18]	superoxide metabolism	Secreted (extracellular)

## Sheet: Iron Pb18
Supplementary Table 3 - Cu, Fe and Zn proteins found in Paracoccidioides spp. isolate Pb18
Pb18 Accession number	Protein description	Functional classification	Localization
PADG_08232	RLI and DUF367 domain-containing protein [Paracoccidioides brasiliensis Pb18]	_	_
PADG_08190	conserved hypothetical protein [Paracoccidioides brasiliensis Pb18]	_	_
PADG_04448	conserved hypothetical protein [Paracoccidioides brasiliensis Pb18]	_	_
PADG_02627	conserved hypothetical protein [Paracoccidioides brasiliensis Pb18]	_	_
PADG_06427	isochorismatase family protein family [Paracoccidioides brasiliensis Pb18]	_	_
PADG_04195	conserved hypothetical protein [Paracoccidioides brasiliensis Pb18]	_	_
PADG_04007	conserved hypothetical protein [Paracoccidioides brasiliensis Pb18]	_	_
PADG_03790	conserved hypothetical protein (ferritin like) [Paracoccidioides brasiliensis Pb18]	_	_
PADG_04745	conserved hypothetical protein [Paracoccidioides brasiliensis Pb18]	_	_
PADG_08456	adenosylmethionine-8-amino-7-oxononanoate aminotransferase [Paracoccidioides brasiliensis Pb18]	amino acid metabolism	Plasma membrane-bound
PADG_01251	diphthamide biosynthesis protein [Paracoccidioides brasiliensis Pb18]	amino acid metabolism	cytoplasmic
PADG_07032	diphthamide biosynthesis protein [Paracoccidioides brasiliensis Pb18]	amino acid metabolism	cytoplasmic
PADG_03395	sulfite reductase subunit beta [Paracoccidioides brasiliensis Pb18]	amino acid metabolism	cytoplasmic
PADG_06872	hydroxyacylglutathione hydrolase [Paracoccidioides brasiliensis Pb18]	amino acid metabolism	cytolasmic
PADG_03774	taurine catabolism dioxygenase TauD [Paracoccidioides brasiliensis Pb18]	amino acid metabolism	cytoplasmic
PADG_02101	ferredoxin-dependent glutamate synthase [Paracoccidioides brasiliensis Pb18]	assimilation of ammonia, metabolism of the glutamate group	cytoplasmic
PADG_03871	urease [Paracoccidioides brasiliensis Pb18]	metabolism of urea (urea cycle)	cytoplasmic
PADG_06252	1,2-dihydroxy-3-keto-5-methylthiopentene dioxygenase [Paracoccidioides brasiliensis Pb18]	metabolism of methionine	cytoplasmic and nuclear
PADG_00600	trimethyllysine dioxygenase [Paracoccidioides brasiliensis Pb18]	metabolism of lysine	Mitochondrial
PADG_01636	4-hydroxyphenylpyruvate dioxygenase [Paracoccidioides brasiliensis Pb18]	biosynthesis of glycine	cytoplasmic
PADG_01418	cysteine dioxygenase [Paracoccidioides brasiliensis Pb18]	degradation of cysteine	nuclear
PADG_08466	homogentisate 1,2-dioxygenase [Paracoccidioides brasiliensis Pb18]	degradation of tyrosine	cytoplasmic
PADG_02498	3-hydroxyanthranilate 3,4-dioxygenase [Paracoccidioides brasiliensis Pb18]	degradation of tryptophan	cytoplasmic
PADG_08623	histidinol-phosphatase [Paracoccidioides brasiliensis Pb18]	biosynthesis of histidine	cytoplasmic
PADG_08468	4-hydroxyphenylpyruvate dioxygenase [Paracoccidioides brasiliensis Pb18]	metabolism of the pyruvate family	cytoplasmic
PADG_03167	3-isopropylmalate dehydratase [Paracoccidioides brasiliensis Pb18]	biosynthesis of leucine	cytoplasmic
PADG_05126	allantoinase [Paracoccidioides brasiliensis Pb18]	nucleotide/nucleoside/nucleobase metabolism	nuclear
PADG_02972	thymine dioxygenase [Paracoccidioides brasiliensis Pb18]	nucleotide/nucleoside/nucleobase metabolism	nuclear
PADG_06357	5'-nucleotidase [Paracoccidioides brasiliensis Pb18]	nucleotide/nucleoside/nucleobase metabolism	nuclear
PADG_06197	xanthine dehydrogenase [Paracoccidioides brasiliensis Pb18]	purin nucleotide/nucleoside/nucleobase metabolism	nuclear
PADG_01660	xanthine dehydrogenase [Paracoccidioides brasiliensis Pb18]	purin nucleotide/nucleoside/nucleobase metabolism	nuclear
PADG_00209	guanine deaminase [Paracoccidioides brasiliensis Pb18]	purin nucleotide/nucleoside/nucleobase metabolism	nuclear
PADG_05643	ribonucleotide reductase R2 subunit variant [Paracoccidioides brasiliensis Pb18]	deoxyribonucleotide metabolism	nuclear
PADG_02857	endopolyphosphatase [Paracoccidioides brasiliensis Pb03]	phosphate metabolism	nuclear
PADG_07862	metallophosphoesterase domain-containing protein	phosphate metabolism	cytoplasmic
PADG_08673	lactoylglutathione lyase [Paracoccidioides brasiliensis Pb18]	C-compound and carbohydrate metabolism	nuclear
PADG_08013	succinate dehydrogenase iron-sulfur subunit [Paracoccidioides brasiliensis Pb18]	C-compound and carbohydrate metabolism	mitochondrial
PADG_04898	3-isopropylmalate dehydratase large subunit	C-compound and carbohydrate metabolism	mitochondrial
PADG_03200	galactose-1-phosphate uridylyltransferase [Paracoccidioides brasiliensis Pb18]	C-compound and carbohydrate metabolism	nuclear
PADG_06215	homoaconitase [Paracoccidioides brasiliensis Pb18]	C-compound and carbohydrate metabolism	mitochondrial
PADG_00126	gamma-butyrobetaine dioxygenase [Paracoccidioides brasiliensis Pb18]	C-compound and carbohydrate metabolism	Mitochondrial
PADG_00361	inositol oxygenase [Paracoccidioides brasiliensis Pb18]	sugar, glucoside, polyol and carboxylate metabolism	cytoplasmic
PADG_02612	inositol oxygenase [Paracoccidioides brasiliensis Pb18]	sugar, glucoside, polyol and carboxylate metabolism	cytoplasmic
PADG_06476	ubiquinone biosynthesis protein CAT5 [Paracoccidioides brasiliensis Pb18]	regulation of C-compound and carbohydrate metabolism	cytoplasmic
PADG_06579	carotenoid cleavage dioxygenase [Paracoccidioides brasiliensis Pb18]	metabolism of vitamins, cofactors, and prosthetic groups	cytoplasmic
PADG_02701	ferrochelatase [Paracoccidioides brasiliensis Pb18]	biosynthesis of vitamins, cofactors, and prosthetic groups	mitochondrial
PADG_06595	molybdenum cofactor biosynthesis protein 1 A [Paracoccidioides brasiliensis Pb18]	biosynthesis of vitamins, cofactors, and prosthetic groups	mitochondrial
PADG_08457	biotin synthase [Paracoccidioides brasiliensis Pb18]	biosynthesis of vitamins, cofactors, and prosthetic groups	mitochondrial
PADG_06059	lipoyl synthase [Paracoccidioides brasiliensis Pb18]	biosynthesis of vitamins, cofactors, and prosthetic groups	mitochondrial
PADG_07494	2Fe-2S iron-sulfur cluster binding domain-containing protein [Paracoccidioides brasiliensis Pb18]	biosynthesis of vitamins, cofactors, and prosthetic groups	mitochondrial
PADG_06779	hydroxyquinol 1,2-dioxygenase [Paracoccidioides brasiliensis Pb18]	secondary metabolism	mitochondrial
PADG_04899	metallo-beta-lactamase domain-containing protein [Paracoccidioides brasiliensis Pb18]	secondary metabolism	mitochondrial
PADG_04698	extradiol ring-cleavage dioxygenase [Paracoccidioides brasiliensis Pb18]	secondary metabolism	cytoplasmic
PADG_03136	metallo-beta-lactamase family protein [Paracoccidioides brasiliensis Pb18]	secondary metabolism	cytoplasmic and nuclear
PADG_06518	2OG-Fe(II) oxygenase family protein, homologue naringenin 3-dioxygenase [Paracoccidioides brasiliensis Pb18]	secondary metabolism	cytoplasmic
PADG_00348	metallo-beta-lactamase superfamily protein [Paracoccidioides brasiliensis Pb18]	secondary metabolism	cytoplasmic
PADG_08242	aconitate hydratase [Paracoccidioides brasiliensis Pb18]	tricarboxylic-acid pathway (citrate cycle, Krebs cycle, TCA cycle)	cytoplasmic
PADG_06540	NADH-ubiquinone reductase 75 kDa subunit, partial [Paracoccidioides brasiliensis Pb18]	electron transport and membrane-associated energy conservation	mitochondrial
PADG_08216	NADH-ubiquinone oxidoreductase 23 kDa subunit [Paracoccidioides brasiliensis Pb18]	electron transport and membrane-associated energy conservation	mitochondrial
PADG_01679	NADH-ubiquinone oxidoreductase 51 kDa subunit [Paracoccidioides brasiliensis Pb18]	electron transport and membrane-associated energy conservation	Mitochondrial
PADG_05436	ubiquinol-cytochrome c reductase iron-sulfur subunit [Paracoccidioides brasiliensis Pb18]	electron transport and membrane-associated energy conservation	mitochondrial
PADG_05481	oxidoreductase [Paracoccidioides brasiliensis Pb18]	electron transport and membrane-associated energy conservation	cytoplasmic
PADG_05655	oxidoreductase [Paracoccidioides brasiliensis Pb18]	electron transport and membrane-associated energy conservation
PADG_04184	oxidoreductase	electron transport and membrane-associated energy conservation	secreted
PADG_03786	NADH-ubiquinone oxidoreductase 24 kDa subunit [Paracoccidioides brasiliensis Pb18]	electron transport and membrane-associated energy conservation	Mitochondrial
PADG_03638	oxidoreductase [Paracoccidioides brasiliensis Pb18]	electron transport and membrane-associated energy conservation
PADG_05626	oxidoreductase, 2OG-Fe(II) oxygenase family protein [Paracoccidioides brasiliensis Pb18]	electron transport and membrane-associated energy conservation	Mitochondrial
PADG_03747	alternative oxidase [Paracoccidioides brasiliensis Pb18]	respiration	Mitochondrial
PADG_07805	DNA primase large subunit [Paracoccidioides brasiliensis Pb18]	DNA synthesis and replication	nuclear
PADG_05078	double-strand break repair protein mus-23 [Paracoccidioides brasiliensis Pb18]	DNA recombination and DNA repair	nuclear
PADG_05536	tRNA (uracil-5-)-methyltransferase [Paracoccidioides brasiliensis Pb18]	DNA repair	nuclear
PADG_02261	elongator complex protein [Paracoccidioides brasiliensis Pb18]	DNA conformation modification (e.g. chromatin)	nuclear
PADG_04133	cell division control protein	mitotic cell cycle and cell cycle control	mitochondrial
PADG_06576	endoribonuclease ysh1 [Paracoccidioides brasiliensis Pb18]	mRNA synthesis	nuclear
PADG_02473	pirin [Paracoccidioides brasiliensis Pb18]	mRNA synthesis	nuclear
PADG_01309	ZZ type zinc finger protein [Paracoccidioides brasiliensis Pb18]	transcriptional control	nuclear
PADG_07535	histone demethylase JARID1C	DNA conformation modification (e.g. chromatin)	nuclear
PADG_02942	jumonji family transcription factor	transcriptional control	nuclear
PADG_00739	GRF zinc finger domain-containing protein [Paracoccidioides brasiliensis Pb18]	transcriptional control	nuclear
PADG_05086	tRNA wybutosine-synthesizing protein [Paracoccidioides brasiliensis Pb18]	tRNA processing	Plasma membrane-bound
PADG_01891	translation initiation factor RLI1 [Paracoccidioides brasiliensis Pb18]	translation iniciation	nuclear
PADG_00111	PKHD-type hydroxylase TPA1 [Paracoccidioides brasiliensis Pb18]	translation termination	mitochondrial
PADG_00265	DUF455 domain-containing protein (ferritin-like domain) [Paracoccidioides brasiliensis Pb18]	protein modification	cytoplasmic
PADG_08685	serine/threonine-protein phosphatase PP1 [Paracoccidioides brasiliensis Pb18]	modification by phosphorylation, dephosphorylation, autophosphorylation	Plasma membrane-bound
PADG_06837	ser/Thr protein phosphatase family [Paracoccidioides brasiliensis Pb18]	modification by phosphorylation, dephosphorylation, autophosphorylation	cytoplasmic
PADG_04974	serine/threonine-protein phosphatase PP2A catalytic subunit [Paracoccidioides brasiliensis Pb18]	modification by phosphorylation, dephosphorylation, autophosphorylation	nuclear
PADG_05082	serine/threonine-protein phosphatase ppe1 [Paracoccidioides brasiliensis Pb18]	modification by phosphorylation, dephosphorylation, autophosphorylation	nuclear
PADG_07331	Ser/Thr protein phosphatase family protein [Paracoccidioides brasiliensis Pb18]	modification by phosphorylation, dephosphorylation, autophosphorylation	Plasma membrane-bound
PADG_07427	serine/threonine-protein phosphatase 2B catalytic subunit [Paracoccidioides brasiliensis Pb18]	modification by phosphorylation, dephosphorylation, autophosphorylation	nuclear
PADG_05516	serine/threonine-protein phosphatase PP-X isozyme 2 [Paracoccidioides brasiliensis Pb18]	modification by phosphorylation, dephosphorylation, autophosphorylation	cytoplasmic and nuclear
PADG_05596	serine/threonine-protein phosphatase PP-X isozyme 1 [Paracoccidioides brasiliensis Pb18]	modification by phosphorylation, dephosphorylation, autophosphorylation	cytoplasmic and nuclear
PADG_00245	ser/Thr protein phosphatase family [Paracoccidioides brasiliensis Pb18]	modification by phosphorylation, dephosphorylation, autophosphorylation
PADG_07693	glycoprotease pgp1 [Paracoccidioides brasiliensis Pb18]	protein/peptide degradation	mitochondrial
PADG_06276	O-sialoglycoprotein endopeptidase [Paracoccidioides brasiliensis Pb18]	protein/peptide degradation	cytoplasmic
PADG_04744	iron-sulfur cluster-binding protein [Paracoccidioides brasiliensis Pb18]	protein binding	_
PADG_01642	iron-binding protein iscA [Paracoccidioides brasiliensis Pb18]	protein binding	Mitochondrial
PADG_01793	iron-sulfur cluster assembly associated protein Nar1 [Paracoccidioides brasiliensis Pb18]	protein binding	cytoplasmic
PADG_00344	iron sulfur assembly protein [Paracoccidioides brasiliensis Pb18]	protein binding	cytoplasmic
PADG_05335	iron sulfur cluster assembly protein [Paracoccidioides brasiliensis Pb18]	protein binding	mitochondrial
PADG_05181	JmjC domain-containing protein [Paracoccidioides brasiliensis Pb18]	DNA binding	nuclear
PADG_07484	cupin domain-containing protein [Paracoccidioides brasiliensis Pb18]	DNA binding	nuclear
PADG_01717	cupin domain-containing protein [Paracoccidioides brasiliensis Pb18]	DNA binding	cytoplasmic and nuclear
PADG_03818	JmjC domain-containing histone demethylation protein [Paracoccidioides brasiliensis Pb18]	DNA binding	nuclear
PADG_02775	calcium transporter [Paracoccidioides brasiliensis Pb18]	cation transport (H+, Na+, K+, Ca2+ , NH4+, etc.)	Plasma membrane-bound
PADG_05846	phytanoyl-CoA dioxygenase family protein [Paracoccidioides brasiliensis Pb18]	electron transport	cytoplasmic
PADG_01579	metallophosphoesterase	electron transport	Cytoplasmic and nuclear
PADG_00577	electron transfer flavoprotein-ubiquinone oxidoreductase [Paracoccidioides brasiliensis Pb18]	electron transport	Mitochondrial
PADG_00200	2OG-Fe(II) oxygenase family protein [Paracoccidioides brasiliensis Pb18]	electron transport	cytoplasmic
PADG_01431	calpain [Paracoccidioides brasiliensis Pb18]	electron transport	cytoplasmic
PADG_01755	superoxide dismutase [Paracoccidioides brasiliensis Pb18]	superoxide metabolism	mitochondrial
PADG_01954	superoxide dismutase [Paracoccidioides brasiliensis Pb18]	superoxide metabolism	mitochondrial
PADG_01263	manganese superoxide dismutase [Paracoccidioides brasiliensis Pb18]	superoxide metabolism	Mitochondrial
PADG_04322	rhodocoxin reductase [Paracoccidioides brasiliensis Pb18]	homeostasis	cytoplasmic
PADG_03852	HIRA interacting protein [Paracoccidioides brasiliensis Pb18]	homeostasis of metal ions (Na, K, Ca etc.)	Mitochondrial

## Sheet: Zinc Pb18
Supplementary Table 3 - Cu, Fe and Zn proteins found in P. brasiliensis isolate Pb18
Pb18 Accession number	Protein description	Functional classification	Localization
PADG_08728	type-2 proteins geranylgeranyltransferase subunit beta [Paracoccidioides brasiliensis Pb18]	lipid, fatty acid and isoprenoid metabolism	Cytoplasmic
PADG_00315	carbonic anhydrase [Paracoccidioides brasiliensis Pb18]	metabolism	Mitochondrial
PADG_05912	RING-14 protein [Paracoccidioides brasiliensis Pb18]	_	_
PADG_08741	predicted protein [Paracoccidioides brasiliensis Pb18]	_	_
PADG_08540	predicted protein [Paracoccidioides brasiliensis Pb18]	_	_
PADG_06860	conserved hypothetical protein [Paracoccidioides brasiliensis Pb18]	_	_
PADG_03048	conserved hypothetical protein [Paracoccidioides brasiliensis Pb18]	_	_
PADG_05832	glutathione-dependent formaldehyde-activating	_	cytoplasmic
PADG_04448	conserved hypothetical protein [Paracoccidioides brasiliensis Pb18]	_	_
PADG_04428	predicted protein [Paracoccidioides brasiliensis Pb18]	_	_
PADG_04362	conserved hypothetical protein [Paracoccidioides brasiliensis Pb18]	_	_
PADG_04354	conserved hypothetical protein [Paracoccidioides brasiliensis Pb18]	_	_
PADG_04314	predicted protein [Paracoccidioides brasiliensis Pb18]	_	_
PADG_01125	conserved hypothetical protein [Paracoccidioides brasiliensis Pb18]	_	_
PADG_02657	DUF636 domain-containing protein [Paracoccidioides brasiliensis Pb18]	_	_
PADG_02946	conserved hypothetical protein [Paracoccidioides brasiliensis Pb18]	_	_
PADG_02953	conserved hypothetical protein [Paracoccidioides brasiliensis Pb18]	_	_
PADG_05515	predicted protein [Paracoccidioides brasiliensis Pb18]	_	_
PADG_00065	predicted protein [Paracoccidioides brasiliensis Pb18]	_	_
PADG_07193	conserved hypothetical protein [Paracoccidioides brasiliensis Pb18]	_	_
PADG_02292	conserved hypothetical protein [Paracoccidioides brasiliensis Pb18]	_	_
PADG_08439	conserved hypothetical protein [Paracoccidioides brasiliensis Pb18]	_	_
PADG_05556	conserved hypothetical protein [Paracoccidioides brasiliensis Pb18]	_	_
PADG_04685	conserved hypothetical protein [Paracoccidioides brasiliensis Pb18]	_	_
PADG_04864	conserved hypothetical protein [Paracoccidioides brasiliensis Pb18]	_	_
PADG_08611	conserved hypothetical protein [Paracoccidioides brasiliensis Pb18]	_	_
PADG_05935	spindle poison sensitivity protein Scp3	_	nuclear
PADG_06927	conserved hypothetical protein [Paracoccidioides brasiliensis Pb18]	_	_
PADG_07491	conserved hypothetical protein [Paracoccidioides brasiliensis Pb18]	_
PADG_08127	conserved hypothetical protein [Paracoccidioides brasiliensis Pb18]	_	_
PADG_08436	conserved hypothetical protein [Paracoccidioides brasiliensis Pb18]	_	_
PADG_00925	conserved hypothetical protein [Paracoccidioides brasiliensis Pb18]	_	_
PADG_08557	conserved hypothetical protein [Paracoccidioides brasiliensis Pb18]	_	_
PADG_08561	conserved hypothetical protein [Paracoccidioides brasiliensis Pb18]	_	_
PADG_08616	conserved hypothetical protein [Paracoccidioides brasiliensis Pb18]	_	_
PADG_01508	hypothetical protein [Paracoccidioides brasiliensis Pb18]	_	_
PADG_03056	conserved hypothetical protein [Paracoccidioides brasiliensis Pb18]	_	_
PADG_04290	conserved hypothetical protein [Paracoccidioides brasiliensis Pb18]	_	_
PADG_05250	conserved hypothetical protein [Paracoccidioides brasiliensis Pb18]	_	_
PADG_05423	conserved hypothetical protein [Paracoccidioides brasiliensis Pb18]	_	_
PADG_05710	conserved hypothetical protein [Paracoccidioides brasiliensis Pb18]	_	_
PADG_05737	conserved hypothetical protein [Paracoccidioides brasiliensis Pb18]	_	_
PADG_06547	conserved hypothetical protein [Paracoccidioides brasiliensis Pb18]	_	_
PADG_04867	N-carbamoyl-L-amino acid hydrolase [Paracoccidioides brasiliensis Pb18]	amino acid metabolism	Cytoplasmic
PADG_03871	urease [Paracoccidioides brasiliensis Pb18]	metabolism of urea (urea cycle)	Cytoplasmic
PADG_08328	Cobalamin-independent methionine synthase [Paracoccidioides brasiliensis Pb18]	biosynthesis of methionine	Mitochondrial
PADG_00875	pentafunctional AROM polypeptide [Paracoccidioides brasiliensis Pb18]	metabolism of the cysteine - aromatic group	Cytoplasmic
PADG_06756	histidine biosynthesis trifunctional protein [Paracoccidioides brasiliensis Pb18]	biosynthesis of histidine	Cytoplasmic
PADG_05126	a+A1:K502llantoinase [Paracoccidioides brasiliensis Pb18]	nitrogen, sulfur and selenium metabolism	Cytoplasmic
PADG_04633	nitrogen regulatory protein areA [Paracoccidioides brasiliensis Pb18]	regulation of nitrogen, sulfur and selenium metabolism	Nuclear
PADG_06490	formamidase [Paracoccidioides brasiliensis Pb18]	nitrogen, sulfur and selenium metabolism	Cytoplasmic
PADG_04387	nicotinamidase [Paracoccidioides brasiliensis Pb18]	catabolism of nitrogenous compounds	Cytoplasmic
PADG_06357	5'-nucleotidase [Paracoccidioides brasiliensis Pb18]	nucleotide/nucleoside/nucleobase metabolism	Nuclear
PADG_01206	adenosine deaminase [Paracoccidioides brasiliensis Pb18]	purin nucleotide/nucleoside/nucleobase metabolism	Cytoplasmic
PADG_07806	adenylate kinase [Paracoccidioides brasiliensis Pb18]	purin nucleotide/nucleoside/nucleobase metabolism	Mitochondrial
PADG_04826	adenosine deaminase family protein [Paracoccidioides brasiliensis Pb18]	purin nucleotide/nucleoside/nucleobase metabolism	Cytoplasmic
PADG_00209	guanine deaminase [Paracoccidioides brasiliensis Pb18]	purin nucleotide/nucleoside/nucleobase metabolism	Mitochondrial
PADG_00106	ectonucleotide pyrophosphatase/phosphodiesterase [Paracoccidioides brasiliensis Pb18]	purin nucleotide/nucleoside/nucleobase metabolism	Nuclear
PADG_00009	AMP deaminase [Paracoccidioides brasiliensis Pb18]	purin nucleotide/nucleoside/nucleobase metabolism	Nuclear
PADG_02162	adenosine deaminase, putative [Paracoccidioides brasiliensis Pb18]	purin nucleotide/nucleoside/nucleobase metabolism	Cytoplasmic
PADG_00026	cytidine deaminase [Paracoccidioides brasiliensis Pb18]	pyrimidine nucleotide/nucleoside/nucleobase metabolism	Mitochondrial
PADG_03688	adenylate cyclase [Paracoccidioides brasiliensis Pb18]	metabolism of cyclic and unusual nucleotides	Nuclear
PADG_08285	deoxyribonuclease tatD [Paracoccidioides brasiliensis Pb18]	DNA degradation	Cytoplasmic
PADG_08250	phosphatase [Paracoccidioides brasiliensis Pb18]	phosphate metabolism	Nuclear
PADG_01579	metallophosphoesterase	phosphate metabolism	Nuclear
PADG_04415	repressible alkaline phosphatase [Paracoccidioides brasiliensis Pb18]	phosphate metabolism	Mitochondrial
PADG_05690	ATPase	phosphate metabolism	nuclear
PADG_07570	peroxisomal NADH pyrophosphatase NUDT12 [Paracoccidioides brasiliensis Pb18]	phosphate metabolism	Cytoplasmic
PADG_02857	endopolyphosphatase [Paracoccidioides brasiliensis Pb18]	phosphate metabolism	Nuclear
PADG_05395	alkaline phosphatase [Paracoccidioides brasiliensis Pb18]	phosphate metabolism	Secreted (extracellular)
PADG_02300	protein phosphatase 2C [Paracoccidioides brasiliensis Pb18]	phosphate metabolism	Nuclear
PADG_08673	lactoylglutathione lyase [Paracoccidioides brasiliensis Pb18]	C-compound and carbohydrate metabolism	Nuclear
PADG_05734	alcohol dehydrogenase [Paracoccidioides brasiliensis Pb18]	C-compound and carbohydrate metabolism	Cytoplasmic
PADG_04265	sorbitol dehydrogenase [Paracoccidioides brasiliensis Pb18]	C-compound and carbohydrate metabolism	Cytoplasmic
PADG_08713	sugar isomerase [Paracoccidioides brasiliensis Pb18]	C-compound and carbohydrate metabolism	Mitochondrial
PADG_08468	4-hydroxyphenylpyruvate dioxygenase [Paracoccidioides brasiliensis Pb18]	C-compound and carbohydrate metabolism	Cytoplasmic
PADG_00926	amidohydrolase family protein [Paracoccidioides brasiliensis Pb18]	C-compound and carbohydrate metabolism	_
PADG_01454	alcohol dehydrogenase [Paracoccidioides brasiliensis Pb18]	C-compound and carbohydrate metabolism	Mitochondrial
PADG_04332	NADP-dependent alcohol dehydrogenase C [Paracoccidioides brasiliensis Pb18]	C-compound and carbohydrate metabolism	Mitochondrial
PADG_01174	alcohol dehydrogenase [Paracoccidioides brasiliensis Pb18]	C-compound and carbohydrate metabolism	Cytoplasmic
PADG_07674	carbonic anhydrase [Paracoccidioides brasiliensis Pb18]	C-compound and carbohydrate metabolism	Mitochondrial
PADG_06722	sorbitol dehydrogenase [Paracoccidioides brasiliensis Pb18]	C-compound and carbohydrate metabolism	secreted
PADG_05031	aryl-alcohol dehydrogenase [Paracoccidioides brasiliensis Pb18]	C-compound and carbohydrate metabolism	Mitochondrial
PADG_04701	alcohol dehydrogenase [Paracoccidioides brasiliensis Pb18]	C-compound and carbohydrate metabolism	Mitochondrial
PADG_03276	S-(hydroxymethyl)glutathione dehydrogenase [Paracoccidioides brasiliensis Pb18]	C-compound and carbohydrate metabolism	Cytoplasmic
PADG_01636	4-hydroxyphenylpyruvate dioxygenase [Paracoccidioides brasiliensis Pb18]	C-compound and carbohydrate metabolism	Cytoplasmic and Nuclear
PADG_01697	carbonic anhydrase [Paracoccidioides brasiliensis Pb18]	C-compound and carbohydrate metabolism	Mitochondrial
PADG_01716	alcohol dehydrogenase [Paracoccidioides brasiliensis Pb18]	C-compound and carbohydrate metabolism	Cytoplasmic
PADG_01987	alcohol dehydrogenase [Paracoccidioides brasiliensis Pb18]	C-compound and carbohydrate metabolism	Cytoplasmic
PADG_05654	2-amino-3-carboxymuconate-6-semialdehyde decarboxylase [Paracoccidioides brasiliensis Pb18]	C-compound and carbohydrate metabolism	Cytoplasmic
PADG_06872	hydroxyacylglutathione hydrolase [Paracoccidioides brasiliensis Pb18]	C-compound and carbohydrate metabolism	Cytoplasmic
PADG_03984	glucosamine-fructose-6-phosphate aminotransferase [Paracoccidioides brasiliensis Pb18]	C-compound and carbohydrate metabolism	Plasma membrane-bound
PADG_03859	L-threonine 3-dehydrogenase	C-compound and carbohydrate metabolism	Cytoplasmic
PADG_02271	alcohol dehydrogenase I [Paracoccidioides brasiliensis Pb18]	C-compound and carbohydrate metabolism	Cytoplasmic
PADG_02132	mannose-6-phosphate isomerase [Paracoccidioides brasiliensis Pb18]	C-compound and carbohydrate metabolism	Cytoplasmic and Nuclear
PADG_05017	chitin deacetylase [Paracoccidioides brasiliensis Pb18]	polysaccharide metabolism	secreted
PADG_03354	polysaccharide deacetylase, putative [Paracoccidioides brasiliensis Pb18]	polysaccharide metabolism	Secreted (extracellular)
PADG_06202	Arp2/3 complex subunit Arc16 [Paracoccidioides brasiliensis Pb18]	polysaccharide metabolism	Cytoplasmic
PADG_04148	alpha-mannosidase [Paracoccidioides brasiliensis Pb18]	polysaccharide metabolism	Mitochondrial
PADG_06862	N-acetylmuramoyl-L-alanine amidase [Paracoccidioides brasiliensis Pb18]	peptidoglycan metabolism	Mitochondrial
PADG_05310	leukotriene A-4 hydrolase [Paracoccidioides brasiliensis Pb18]	lipid, fatty acid and isoprenoid metabolism	Peroxissomal
PADG_02837	trans-2-enoyl-CoA reductase [Paracoccidioides brasiliensis Pb18]	lipid, fatty acid and isoprenoid metabolism	Cytoplasmic
PADG_01073	palmitoyltransferase pfa3 [Paracoccidioides brasiliensis Pb18]	lipid, fatty acid and isoprenoid metabolism	Plasma membrane-bound
PADG_01277	1-phosphatidylinositol-3-phosphate 5-kinase FAB1 [Paracoccidioides brasiliensis Pb18]	lipid, fatty acid and isoprenoid metabolism	Mitochondrial
PADG_07031	hydroxymethylglutaryl-CoA lyase [Paracoccidioides brasiliensis Pb18]	lipid, fatty acid and isoprenoid metabolism	Mitochondrial
PADG_06079	palmitoyltransferase erf2 [Paracoccidioides brasiliensis Pb18]	lipid, fatty acid and isoprenoid metabolism	Plasma membrane-bound
PADG_06834	2-isopropylmalate synthase [Paracoccidioides brasiliensis Pb18]	lipid, fatty acid and isoprenoid metabolism	Cytoplasmic
PADG_07451	lanosterol synthase [Paracoccidioides brasiliensis Pb18]	lipid, fatty acid and isoprenoid metabolism	Cytoplasmic
PADG_00557	fatty acid synthase	fatty acid metabolism	Plasma membrane-bound
PADG_00244	trans-2-enoyl-CoA reductase [Paracoccidioides brasiliensis Pb18]	lipid, fatty acid and isoprenoid metabolism	Mitochondrial
PADG_05666	N-acetylglucosaminyl-phosphatidylinositol de-N-acetylase [Paracoccidioides brasiliensis Pb18]	phospholipid metabolism	Plasma membrane-bound
PADG_02849	6-methylsalicylic acid synthase [Paracoccidioides brasiliensis Pb18]	fatty acid metabolism	Cytoplasmic
PADG_02384	delta-aminolevulinic acid dehydratase [Paracoccidioides brasiliensis Pb18]	biosynthesis of vitamins, cofactors, and prosthetic groups	Cytoplasmic
PADG_02130	GTP cyclohydrolase-2 [Paracoccidioides brasiliensis Pb18]	biosynthesis of vitamins, cofactors, and prosthetic groups	Nuclear
PADG_05325	isochorismatase family protein	secondary metabolism	Cytoplasmic
PADG_04899	metallo-beta-lactamase domain-containing protein	secondary metabolism	mitochondrial
PADG_07352	isochorismatase family hydrolase, putative	secondary metabolism	cytoplasmic
PADG_03136	metallo-beta-lactamase family protein [Paracoccidioides brasiliensis Pb18]	secondary metabolism	_
PADG_00348	metallo-beta-lactamase superfamily protein [Paracoccidioides brasiliensis Pb18]	secondary metabolism	_
PADG_08543	3-dehydroshikimate dehydratase [Paracoccidioides brasiliensis Pb18]	metabolism of derivatives of dehydroquinic acid, shikimic acid and chorismic acid	Mitochondrial
PADG_01628	diphthamide biosynthesis protein [Paracoccidioides brasiliensis Pb18]	metabolism of secondary products derived from L-lysine, L-arginine and L-histidine	Cytoplasmic
PADG_03432	penicillopepsin [Paracoccidioides brasiliensis Pb18]	extracellular protein degradation	Secreted (extracellular)
PADG_08012	fructose-bisphosphate aldolase [Paracoccidioides brasiliensis Pb18]	glycolysis and gluconeogenesis	Cytoplasmic
PADG_01706	fructose-1,6-bisphosphatase [Paracoccidioides brasiliensis Pb18]	glycolysis and gluconeogenesis	Cytoplasmic
PADG_00668	fructose-bisphosphate aldolase [Paracoccidioides brasiliensis Pb18]	glycolysis and gluconeogenesis	Cytoplasmic
PADG_04103	pyruvate carboxylase [Paracoccidioides brasiliensis Pb18]	glycolysis and gluconeogenesis	Cytoplasmic
PADG_04059	enolase [Paracoccidioides brasiliensis Pb18]	glycolysis and gluconeogenesis	Cytoplasmic
PADG_05874	negative regulation of gluconeogenesis protein [Paracoccidioides brasiliensis Pb18]	regulation of glycolysis and gluconeogenesis	Nuclear
PADG_03884	putative RMND5A protein [Paracoccidioides brasiliensis Pb18]	regulation of glycolysis and gluconeogenesis	Nuclear
PADG_00141	ribulose-phosphate 3-epimerase [Paracoccidioides brasiliensis Pb18]	pentose-phosphate pathway non oxidative branch	Cytoplasmic
PADG_08387	citrate synthase [Paracoccidioides brasiliensis Pb18]	tricarboxylic-acid pathway (citrate cycle, Krebs cycle, TCA cycle)	Mitochondrial
PADG_04993	ATP-citrate synthase subunit 1 [Paracoccidioides brasiliensis Pb18]	tricarboxylic-acid pathway (citrate cycle, Krebs cycle, TCA cycle)	Cytoplasmic
PADG_00743	Class II Aldolase family protein [Paracoccidioides brasiliensis Pb18]	tricarboxylic-acid pathway (citrate cycle, Krebs cycle, TCA cycle)	_
PADG_08394	cytochrome b-c1 complex subunit 2 [Paracoccidioides brasiliensis Pb18]	electron transport and membrane-associated energy conservation	Mitochondrial
PADG_02745	NADH-ubiquinone oxidoreductase [Paracoccidioides brasiliensis Pb18]	electron transport and membrane-associated energy conservation	Mitochondrial
PADG_04397	cytochrome c oxidase polypeptide IV [Paracoccidioides brasiliensis Pb18]	electron transport and membrane-associated energy conservation	Cytoplasmic
PADG_04280	quinone oxidoreductase	regulation of electron transport and membrane-associated energy conservation	Cytoplasmic
PADG_05523	quinone oxidoreductase [Paracoccidioides brasiliensis Pb18]	regulation of electron transport and membrane-associated energy conservation	_
PADG_07836	quinone oxidoreductase [Paracoccidioides brasiliensis Pb18]	regulation of electron transport and membrane-associated energy conservation	Cytoplasmic
PADG_07272	ATP-dependent helicase NAM7 [Paracoccidioides brasiliensis Pb18]	DNA processing	nuclear
PADG_01027	PHD and RING finger domain-containing protein	DNA processing	nuclear
PADG_01033	nucleus protein	DNA processing	nuclear
PADG_02402	replication factor C subunit 3 [Paracoccidioides brasiliensis Pb18]	DNA synthesis and replication	Nuclear
PADG_06206	replication factor C subunit 4 [Paracoccidioides brasiliensis Pb18]	DNA synthesis and replication	Nuclear
PADG_01937	origin recognition complex subunit 1 [Paracoccidioides brasiliensis Pb18]	DNA synthesis and replication	Nuclear
PADG_04172	replication factor C subunit 2 [Paracoccidioides brasiliensis Pb18]	DNA synthesis and replication	Nuclear
PADG_07084	chromosome transmission fidelity protein 18 [Paracoccidioides brasiliensis Pb18]	DNA synthesis and replication	Nuclear
PADG_07061	replication factor C subunit 1 [Paracoccidioides brasiliensis Pb18]	DNA synthesis and replication	Nuclear
PADG_07835	replication factor-A protein [Paracoccidioides brasiliensis Pb18]	DNA synthesis and replication	Nuclear
PADG_04531	DNA mismatch repair protein [Paracoccidioides brasiliensis Pb18]	DNA recombination and DNA repair	Nuclear
PADG_02081	RING finger domain-containing protein [Paracoccidioides brasiliensis Pb18]	DNA repair	Nuclear
PADG_01045	postreplication repair E3 ubiquitin-protein ligase rad18 [Paracoccidioides brasiliensis Pb18]	DNA repair	Nuclear
PADG_05078	double-strand break repair protein mus-23 [Paracoccidioides brasiliensis Pb18]	DNA repair	Nuclear
PADG_02430	suppressor protein of bem1/bed5 double mutants [Paracoccidioides brasiliensis Pb18]	DNA repair	Nuclear
PADG_04811	SWI/SNF family DNA-dependent ATPase Ris1 [Paracoccidioides brasiliensis Pb18]	DNA repair	Nuclear
PADG_01667	DNA-dependent ATPase MGS1 [Paracoccidioides brasiliensis Pb18]	DNA repair	Nuclear
PADG_05670	DNA repair protein rad5 [Paracoccidioides brasiliensis Pb18]	DNA repair	Nuclear
PADG_00223	DNA repair protein Nse1	DNA repair	nuclear
PADG_03787	DNA repair protein rad8 [Paracoccidioides brasiliensis Pb18]	DNA repair	Plasma membrane-bound
PADG_06545	suppressor of stem-loop protein [Paracoccidioides brasiliensis Pb18]	DNA repair	Nuclear
PADG_03812	NAD-dependent deacetylase sirtuin-2 [Paracoccidioides brasiliensis Pb18]	DNA restriction or modification	Nuclear
PADG_08521	histone deacetylase HosB [Paracoccidioides brasiliensis Pb18]	DNA conformation modification (e.g. chromatin)	Nuclear
PADG_05093	histone acetyltransferase SAS2 [Paracoccidioides brasiliensis Pb18]	DNA conformation modification (e.g. chromatin)	Nuclear
PADG_04450	histone deacetylase RPD3 [Paracoccidioides brasiliensis Pb18]	DNA conformation modification (e.g. chromatin)	Nuclear
PADG_04443	MIZ zinc finger domain-containing protein [Paracoccidioides brasiliensis Pb18]	DNA conformation modification (e.g. chromatin)	Nuclear
PADG_04376	histone deacetylase phd1 [Paracoccidioides brasiliensis Pb18]	DNA conformation modification (e.g. chromatin)	Nuclear
PADG_02881	histone-lysine N-methyltransferase [Paracoccidioides brasiliensis Pb18]	DNA conformation modification (e.g. chromatin)	Nuclear
PADG_01691	histone acetyltransferase mst2 [Paracoccidioides brasiliensis Pb18]	DNA conformation modification (e.g. chromatin)	Nuclear
PADG_01806	NAD-dependent histone deacetylase SIR2 [Paracoccidioides brasiliensis Pb18]	DNA conformation modification (e.g. chromatin)	Nuclear
PADG_01916	Sir2 family histone deacetylase Hst4 [Paracoccidioides brasiliensis Pb18]	DNA conformation modification (e.g. chromatin)	Nuclear
PADG_05400	histone acetyltransferase ESA1 [Paracoccidioides brasiliensis Pb18]	DNA conformation modification (e.g. chromatin)	Nuclear
PADG_05911	meiotically up-regulated gene 185 protein [Paracoccidioides brasiliensis Pb18]	mitotic cell cycle and cell cycle control	Nuclear
PADG_08069	FACT complex subunit spt16 [Paracoccidioides brasiliensis Pb18]	mitotic cell cycle and cell cycle control	Nuclear
PADG_02724	asparagine-rich protein [Paracoccidioides brasiliensis Pb18]	mitotic cell cycle and cell cycle control	_
PADG_07704	negative regulator of the PHO system [Paracoccidioides brasiliensis Pb18]	mitotic cell cycle and cell cycle control	Nuclear
PADG_05683	cell division control protein Cdc48[Paracoccidioides brasiliensis Pb18]	mitotic cell cycle and cell cycle control	Nuclear
PADG_03241	Mob1 family protein [Paracoccidioides brasiliensis Pb18]	mitotic cell cycle and cell cycle control	_
PADG_00563	cell division cycle protein	mitotic cell cycle and cell cycle control	Nuclear
PADG_00442	arf gtpase-activating protein [Paracoccidioides brasiliensis Pb18]	mitotic cell cycle and cell cycle control	Secreted (extracellular)
PADG_04133	cell division control protein	mitotic cell cycle and cell cycle control	Mitochondrial
PADG_07904	Cut9-interacting protein scn1 [Paracoccidioides brasiliensis Pb18]	mitotic cell cycle and cell cycle control	Nuclear
PADG_03482	metaphase-anaphase transition protein [Paracoccidioides brasiliensis Pb18]	mitotic cell cycle and cell cycle control	Nuclear
PADG_07041	maintenance of ploidy protein mob1 [Paracoccidioides brasiliensis Pb18]	mitotic cell cycle and cell cycle control	Nuclear
PADG_08025	pachytene checkpoint component Pch2 [Paracoccidioides brasiliensis Pb18]	cell cycle checkpoints (checkpoints of morphogenesis, DNA-damage,-replication, mitotic phase and spindle	Nuclear
PADG_04843	meiosis specific protein Hop1	meiosis	nuclear
PADG_00843	chromosome segregation protein BIR1 [Paracoccidioides brasiliensis Pb18]	chromosome segregation/division	Nuclear
PADG_08395	RNA polymerase III subunit RPC82 [Paracoccidioides brasiliensis Pb18]	RNA synthesis	Nuclear
PADG_01215	Fungal Zn binuclear cluster domain containing protein	RNA synthesis	nuclear
PADG_06520	DNA-directed RNA polymerases N/8 kDa subunit superfamily protein [Paracoccidioides brasiliensis Pb18]	RNA synthesis	Nuclear
PADG_06424	DNA-directed RNA polymerase III subunit RPC1 [Paracoccidioides brasiliensis Pb18]	RNA synthesis	Nuclear
PADG_05405	DNA-directed RNA polymerase I subunit RPA12 [Paracoccidioides brasiliensis Pb18]	RNA synthesis	Cytoplasmic
PADG_00693	DNA-directed RNA polymerase III subunit RPC10 [Paracoccidioides brasiliensis Pb18]	RNA synthesis	Mitochondrial
PADG_00860	DNA-directed RNA polymerase I subunit RPA1 [Paracoccidioides brasiliensis Pb18]	RNA synthesis	Cytoplasmic
PADG_07927	WD repeat-containing protein [Paracoccidioides brasiliensis Pb18]	RNA synthesis	_
PADG_02358	WD domain-containing protein [Paracoccidioides brasiliensis Pb18]	RNA synthesis	Mitochondrial
PADG_00814	branchpoint-bridging protein [Paracoccidioides brasiliensis Pb18]	RNA synthesis	Nuclear
PADG_02607	poly(ADP)-ribose polymerase [Paracoccidioides brasiliensis Pb18]	RNA synthesis	Mitochondrial
PADG_00479	tRNA-specific adenosine deaminase [Paracoccidioides brasiliensis Pb18]	tRNA synthesis	Nuclear
PADG_06576	endoribonuclease ysh1 [Paracoccidioides brasiliensis Pb18]	mRNA synthesis	Mitochondrial
PADG_06747	DNA-directed RNA polymerase II subunit RPB1 [Paracoccidioides brasiliensis Pb18]	mRNA synthesis	Cytoplasmic and Nuclear
PADG_05900	transcription elongation factor 1 [Paracoccidioides brasiliensis Pb18]	general transcription activities	Mitochondrial
PADG_02736	zinc finger protein [Paracoccidioides brasiliensis Pb18]	general transcription activities	_
PADG_05205	DNA directed RNA polymerase II 15 kDa subunit [Paracoccidioides brasiliensis Pb18]	general transcription activities	Nuclear
PADG_05211	transcription factor spTFIIE [Paracoccidioides brasiliensis Pb18]	general transcription activities	Cytoplasmic
PADG_04340	DNA-directed RNA polymerase II subunit RPB2 [Paracoccidioides brasiliensis Pb18]	general transcription activities	Nuclear
PADG_01309	ZZ type zinc finger protein [Paracoccidioides brasiliensis Pb18]	general transcription activities	_
PADG_00034	transcription elongation factor S-II [Paracoccidioides brasiliensis Pb18]	general transcription activities	Nuclear
PADG_07959	transcriptional activator	transcription initiation	nuclear
PADG_00687	transcription initiation factor IIB [Paracoccidioides brasiliensis Pb18]	transcription initiation	Cytoplasmic
PADG_02531	transcription initiation factor TFIId 127kD subunit [Paracoccidioides brasiliensis Pb18]	transcription initiation	Nuclear
PADG_05320	RING finger domain-containing protein [Paracoccidioides brasiliensis Pb18]	transcriptional control	Nuclear
PADG_01189	RING finger protein	transcriptional control	nuclear
PADG_05256	C6 zinc finger domain-containing protein [Paracoccidioides brasiliensis Pb18]	transcriptional control	nuclear
PADG_02410	histone deacetylase hda1 [Paracoccidioides brasiliensis Pb18]	transcriptional control	Nuclear
PADG_08056	MIZ zinc finger protein [Paracoccidioides brasiliensis Pb18]	transcriptional control	Nuclear
PADG_08656	cutinase transcription factor 1 alpha [Paracoccidioides brasiliensis Pb18]	transcriptional control	Nuclear
PADG_08497	CHY zinc finger domain-containing protein	transcriptional control	nuclear
PADG_08233	L-azetidine-2-carboxylic acid acetyltransferase	transcriptional control	Nuclear
PADG_08275	C2H2 finger domain-containing protein [Paracoccidioides brasiliensis Pb18]	transcriptional control	nuclear
PADG_02756	C6 finger domain-containing protein [Paracoccidioides brasiliensis Pb18]	transcriptional control	Nuclear
PADG_05749	fungal specific transcription factor domain-containing protein [Paracoccidioides brasiliensis Pb18]	transcriptional control	Nuclear
PADG_00865	C2H2 transcription factor (Rpn4) [Paracoccidioides brasiliensis Pb18]	transcriptional control	Nuclear
PADG_01460	C6 transcription factor (AmyR) [Paracoccidioides brasiliensis Pb18]	transcriptional control	Nuclear
PADG_01547	CCCH zinc finger and SMR domain-containing protein [Paracoccidioides brasiliensis Pb18]	transcriptional control	_
PADG_01589	cutinase gene palindrome-binding protein	transcriptional control	Nuclear
PADG_04353	C6 transcription factor	transcriptional control	nuclear
PADG_04335	C6 transcription factor	transcriptional control	nuclear
PADG_01060	C2H2 type zinc finger containing protein	transcriptional control	nuclear
PADG_01105	C6 finger domain-containing protein	transcriptional control	nuclear
PADG_01323	PHD finger and SET domain-containing protein [Paracoccidioides brasiliensis Pb18]	transcriptional control	_
PADG_01346	transcriptional regulatory protein pro-1 [Paracoccidioides brasiliensis Pb18]	transcriptional control	Nuclear
PADG_01369	transcriptional adapter 2 [Paracoccidioides brasiliensis Pb18]	transcriptional control	Nuclear
PADG_07951	C2HC5 finger protein [Paracoccidioides brasiliensis Pb18]	transcriptional control	Nuclear
PADG_06077	C6 transcription factor	transcriptional control	nuclear
PADG_05968	ZZ type zinc finger domain-containing protein, partial [Paracoccidioides brasiliensis Pb18]	transcriptional control	_
PADG_07645	acetamidase regulatory protein [Paracoccidioides brasiliensis Pb18]	transcriptional control	Nuclear
PADG_06636	C6 transcription factor, putative [Paracoccidioides brasiliensis Pb18]	transcriptional control	Nuclear
PADG_04897	C2H2 finger domain-containing protein	transcriptional control	nuclear
PADG_05012	zinc finger protein zpr1 [Paracoccidioides brasiliensis Pb18]	transcriptional control	Nuclear
PADG_02459	CCCH zinc finger protein [Paracoccidioides brasiliensis Pb18]	transcriptional control	_
PADG_02514	RING finger protein [Paracoccidioides brasiliensis Pb18]	transcriptional control	Plasma membrane-bound
PADG_02585	CCCH zinc finger protein [Paracoccidioides brasiliensis Pb18]	transcriptional control	_
PADG_02653	zinc finger protein gcs1 [Paracoccidioides brasiliensis Pb18]	transcriptional control	Mitochondrial
PADG_04538	RING finger domain-containing protein	transcriptional control	nuclear
PADG_04563	fungal specific transcription factor domain-containing protein [Paracoccidioides brasiliensis Pb18]	transcriptional control	Nuclear
PADG_04605	acetate regulatory DNA binding protein FacB [Paracoccidioides brasiliensis Pb18]	transcriptional control	Nuclear
PADG_04638	putative C2H2 finger domain protein [Paracoccidioides brasiliensis Pb18]	transcriptional control	Nuclear
PADG_04758	RING finger protein [Paracoccidioides brasiliensis Pb18]	transcriptional control	_
PADG_07358	ctranscriptional regulator (Cti6) [Paracoccidioides brasiliensis Pb18]	transcriptional control	Nuclear
PADG_07535	PHD transcription factor, putative [Paracoccidioides brasiliensis Pb18]	transcriptional control	Nuclear
PADG_03182	C6 finger domain-containing protein	transcriptional control	nuclear
PADG_03251	C6 finger domain-containing protein Acr-2 [Paracoccidioides brasiliensis Pb18]	transcriptional control	Nuclear
PADG_03448	C2H2 type zinc finger containing protein [Paracoccidioides brasiliensis Pb18]	transcriptional control	_
PADG_02958	PHD finger domain protein	transcriptional control	nuclear
PADG_03087	C6 zinc finger domain-containing protein [Paracoccidioides brasiliensis Pb18]	transcriptional control	_
PADG_06506	C6 transcription factor	transcriptional control	nuclear
PADG_06503	CCCH zinc finger domain-containing protein [Paracoccidioides brasiliensis Pb18]	transcriptional control	_
PADG_07996	fungal specific transcription factor domain-containing protein [Paracoccidioides brasiliensis Pb18]	transcriptional control	Nuclear
PADG_06195	C2H2 finger domain transcription factor	transcriptional control	nuclear
PADG_06185	gastrula zinc finger protein XlCGF49.1 [Paracoccidioides brasiliensis Pb18]	transcriptional control	Nuclear
PADG_01819	C6 transcription factor Prf [Paracoccidioides brasiliensis Pb18]	transcriptional control	Nuclear
PADG_05366	SAGA complex component Sgf73 [Paracoccidioides brasiliensis Pb18]	transcriptional control	Nuclear
PADG_05442	C6 transcription factor [Paracoccidioides brasiliensis Pb18]	transcriptional control	Nuclear
PADG_05470	C6 zinc finger domain-containing protein [Paracoccidioides brasiliensis Pb18]	transcriptional control	Nuclear
PADG_05497	GATA factor SREP [Paracoccidioides brasiliensis Pb18]	transcriptional control	Nuclear
PADG_05625	MYND domain protein (SamB)	transcriptional control	Nuclear
PADG_06857	GATA transcription factor	transcriptional control	nuclear
PADG_06900	RING finger domain-containing protein	transcriptional control	nuclear
PADG_00482	zinc finger transcription factor 1 [Paracoccidioides brasiliensis Pb18]	transcriptional control	Nuclear
PADG_00531	RING finger protein [Paracoccidioides brasiliensis Pb18]	transcriptional control	_
PADG_00706	putative PHD transcription factor [Paracoccidioides brasiliensis Pb18]	transcriptional control	Nuclear
PADG_00739	GRF zinc finger domain-containing protein [Paracoccidioides brasiliensis Pb18]	transcriptional control	_
PADG_00727	C6 transcription factor, putatively related to purine utilization [Paracoccidioides brasiliensis Pb18]	transcriptional control	Nuclear
PADG_00844	C2H2 finger domain-containing protein	transcriptional control	nuclear
PADG_00414	zinc finger protein	transcriptional control	nuclear
PADG_04023	transcription factor IIIA [Paracoccidioides brasiliensis Pb18]	transcriptional control	Nuclear
PADG_03929	cutinase transcription factor 1	transcriptional control	Nuclear
PADG_03818	JmjC domain-containing histone demethylation protein [Paracoccidioides brasiliensis Pb18]	transcriptional control	Nuclear
PADG_03669	DNL zinc finger domain-containing protein [Paracoccidioides brasiliensis Pb18]	transcriptional control	_
PADG_03596	DBF zinc finger domain-containing protein	transcriptional control	Nuclear
PADG_07126	RING finger domain-containing protein [Paracoccidioides brasiliensis Pb18]	transcriptional control	_
PADG_06931	GATA type zinc finger protein Asd4	transcriptional control	Nuclear
PADG_08132	C6 transcription factor [Paracoccidioides brasiliensis Pb18]	transcriptional control	Nuclear
PADG_02422	C6 zinc finger domain-containing protein [Paracoccidioides brasiliensis Pb18]	transcriptional control	Nuclear
PADG_04456	Zn(II)2Cys6 transcriptional activator [Paracoccidioides brasiliensis Pb18]	transcriptional control	Nuclear
PADG_03597	C6 finger domain-containing protein	transcriptional control	nuclear
PADG_01604	RING finger protein ETP1 homolog [Paracoccidioides brasiliensis Pb18]	transcriptional control	Cytoplasmic
PADG_01781	U1 zinc finger domain-containing protein [Paracoccidioides brasiliensis Pb18]	transcriptional control	_
PADG_00157	C6 finger domain-containing protein	transcriptional control	nuclear
PADG_00035	C6 transcription factor	transcriptional control	Nuclear
PADG_07417	C6 transcription factor (NirA)	transcriptional control	Nuclear
PADG_05720	C6 transcription factor, putative [Paracoccidioides brasiliensis Pb18]	transcriptional control	Nuclear
PADG_07665	C2H2 finger domain-containing protein FlbC [Paracoccidioides brasiliensis Pb18]	transcriptional control	Nuclear
PADG_04074	RING finger domain-containing protein [Paracoccidioides brasiliensis Pb18]	transcriptional control	Nuclear
PADG_05953	C6 transcription factor (Fcr1) [Paracoccidioides brasiliensis Pb18]	transcriptional control	Nuclear
PADG_05945	GATA-factor [Paracoccidioides brasiliensis Pb18]	transcription activation	Nuclear
PADG_07267	fungal specific transcription factor domain-containing protein [Paracoccidioides brasiliensis Pb18]	transcription activation	Nuclear
PADG_03249	putative transcriptional activator protein FacB [Paracoccidioides brasiliensis Pb18]	transcription activation	Nuclear
PADG_02850	fungal specific transcription factor domain-containing protein [Paracoccidioides brasiliensis Pb18]	transcription activation	Nuclear
PADG_02986	leupaxin	transcription activation	Nuclear
PADG_01790	metallothionein-I gene transcription activator [Paracoccidioides brasiliensis Pb18]	transcription activation	Secreted (extracellular)
PADG_03731	fungal specific transcription factor domain-containing protein [Paracoccidioides brasiliensis Pb18]	transcription activation	_
PADG_07987	putative NF-X1 finger transcription factor [Paracoccidioides brasiliensis Pb18]	transcription repression	Nuclear
PADG_08498	C3HC zinc finger domain-containing protein [Paracoccidioides brasiliensis Pb18]	transcriptional control	nuclear
PADG_07529	tRNA-guanine transglycosylase family protein [Paracoccidioides brasiliensis Pb18]	tRNA processing	Nuclear
PADG_06217	tRNA modification GTPase GTPBP3 [Paracoccidioides brasiliensis Pb18]	tRNA processing	Nuclear
PADG_05786	splicing factor 3A subunit 3 [Paracoccidioides brasiliensis Pb18]	splicing	Nuclear
PADG_04369	splicing factor U2AF 23 kDa subunit [Paracoccidioides brasiliensis Pb18]	splicing	Nuclear
PADG_01022	pre-mRNA-splicing factor ini1 [Paracoccidioides brasiliensis Pb18]	splicing	Nuclear
PADG_02681	pre-mRNA-splicing factor cwc24 [Paracoccidioides brasiliensis Pb18]	splicing	Nuclear
PADG_08502	IBR finger domain-containing protein [Paracoccidioides brasiliensis Pb18]	Regulation of splicing	_
PADG_00264	IBR domain-containing protein [Paracoccidioides brasiliensis Pb18]	Regulation of splicing	_
PADG_07745	mRNA 3'-end-processing protein yth1 [Paracoccidioides brasiliensis Pb18]	3'-end processing	Nuclear
PADG_08529	queuine tRNA-ribosyltransferase [Paracoccidioides brasiliensis Pb18]	tRNA modification	Nuclear
PADG_06191	tRNA isopentenyltransferase [Paracoccidioides brasiliensis Pb18]	tRNA modification	Nuclear
PADG_02311	ribosome biogenesis ATPase RIX7 [Paracoccidioides brasiliensis Pb18]	ribosome biogenesis	Nuclear
PADG_02226	putative ribosome biogenesis GTPase Lsg1 [Paracoccidioides brasiliensis Pb18]	ribosome biogenesis	Nuclear
PADG_03826	40S ribosomal protein S29 [Paracoccidioides brasiliensis Pb18]	ribosomal proteins	Nuclear
PADG_04210	eukaryotic translation initiation factor 2 beta subunit [Paracoccidioides brasiliensis Pb18]	translation initiation	Nuclear
PADG_08204	translation initiation factor IF-2 [Paracoccidioides brasiliensis Pb18]	translation initiation	Nuclear
PADG_05358	eukaryotic translation initiation factor 5 [Paracoccidioides brasiliensis Pb18]	translation initiation	Nuclear
PADG_05897	seryl-tRNA synthetase [Paracoccidioides brasiliensis Pb18]	aminoacyl-tRNA-synthetases	Cytoplasmic
PADG_08579	isoleucyl-tRNA synthetase [Paracoccidioides brasiliensis Pb18]	aminoacyl-tRNA-synthetases	Mitochondrial
PADG_05848	glycyl-tRNA synthetase [Paracoccidioides brasiliensis Pb18]	aminoacyl-tRNA-synthetases	Cytoplasmic
PADG_00908	seryl-tRNA synthetase synthetase [Paracoccidioides brasiliensis Pb18]	aminoacyl-tRNA-synthetases	Mitochondrial
PADG_06637	threonyl-tRNA synthetase [Paracoccidioides brasiliensis Pb18]	aminoacyl-tRNA-synthetases	Mitochondrial
PADG_04949	threonyl-tRNA synthetase [Paracoccidioides brasiliensis Pb18]	aminoacyl-tRNA-synthetases	Cytoplasmic
PADG_03440	prolyl-tRNA synthetase [Paracoccidioides brasiliensis Pb18]	aminoacyl-tRNA-synthetases	Cytoplasmic
PADG_02918	prolyl-tRNA synthetase [Paracoccidioides brasiliensis Pb18]	aminoacyl-tRNA-synthetases	Cytoplasmic
PADG_00002	alanyl-tRNA synthetase [Paracoccidioides brasiliensis Pb18]	aminoacyl-tRNA-synthetases	Cytoplasmic
PADG_04116	methionyl-tRNA synthetase [Paracoccidioides brasiliensis Pb18]	aminoacyl-tRNA-synthetases	Cytoplasmic
PADG_02340	methionyl-tRNA synthetase [Paracoccidioides brasiliensis Pb18]	aminoacyl-tRNA-synthetases	Cytoplasmic
PADG_05229	chaperone protein dnaJ 3 [Paracoccidioides brasiliensis Pb18]	protein folding and stabilization	Endoplasmic reticulum
PADG_01086	chaperone protein dnaJ	protein folding and stabilization	Cytoplasmic
PADG_08659	ATPase family AAA domain-containing protein 1-B [Paracoccidioides brasiliensis Pb18]	protein targeting, sorting and translocation	Cytoplasmic
PADG_05107	vacuolar protein sorting-associated protein [Paracoccidioides brasiliensis Pb18]	protein targeting, sorting and translocation	Cytoplasmic
PADG_07007	ATPase family AAA domain-containing protein [Paracoccidioides brasiliensis Pb18]	protein targeting, sorting and translocation	Mitochondrial
PADG_03936	AAA family ATPase [Paracoccidioides brasiliensis Pb18]	protein targeting, sorting and translocation	_
PADG_03238	chaperone protein dnaJ [Paracoccidioides brasiliensis Pb18]	protein targeting, sorting and translocation	Mitochondrial
PADG_03274	mitochondrial import inner membrane translocase subunit tim9 [Paracoccidioides brasiliensis Pb18]	protein targeting, sorting and translocation	Nuclear
PADG_00284	AAA family ATPase [Paracoccidioides brasiliensis Pb18]	protein targeting, sorting and translocation	Mitochondrial
PADG_04070	AAA family ATPase	protein targeting, sorting and translocation	nuclear
PADG_04034	mitochondrial protein import protein MAS5 [Paracoccidioides brasiliensis Pb18]	protein targeting, sorting and translocation	Cytoplasmic
PADG_03564	vacuolar protein sorting-associated protein [Paracoccidioides brasiliensis Pb18]	protein targeting, sorting and translocation	Nuclear
PADG_07209	AAA family ATPase	protein targeting, sorting and translocation	nuclear
PADG_07153	mitochondrial import inner membrane translocase subunit tim13 [Paracoccidioides brasiliensis Pb18]	protein targeting, sorting and translocation	Nuclear
PADG_06735	AAA family ATPase	protein targeting, sorting and translocation	mitochondrial
PADG_08632	vacuolar protein-sorting-associated protein [Paracoccidioides brasiliensis Pb18]	protein targeting, sorting and translocation	Nuclear
PADG_03882	mitochondrial intermembrane space translocase subunit Tim10 [Paracoccidioides brasiliensis Pb18]	protein targeting, sorting and translocation	Nuclear
PADG_01610	CaaX farnesyltransferase beta subunit [Paracoccidioides brasiliensis Pb18]	modification with fatty acids (e.g. myristylation, palmitylation, farnesylation)	Plasma membrane-bound
PADG_03912	geranylgeranyl transferase type I beta subunit [Paracoccidioides brasiliensis Pb18]	modification with fatty acids (e.g. myristylation, palmitylation, farnesylation)	Mitochondrial
PADG_07342	palmitoyltransferase pfa5 [Paracoccidioides brasiliensis Pb18]	modification with fatty acids (e.g. myristylation, palmitylation, farnesylation)	Plasma membrane-bound
PADG_06668	phosphatase 2c [Paracoccidioides brasiliensis Pb18]	modification by phosphorylation, dephosphorylation, autophosphorylation	Mitochondrial
PADG_06837	ser/Thr protein phosphatase family [Paracoccidioides brasiliensis Pb18]	modification by phosphorylation, dephosphorylation, autophosphorylation	_
PADG_05082	serine/threonine-protein phosphatase ppe1 [Paracoccidioides brasiliensis Pb18]	modification by phosphorylation, dephosphorylation, autophosphorylation	Nuclear
PADG_04565	casein kinase II subunit beta-1 [Paracoccidioides brasiliensis Pb18]	modification by phosphorylation, dephosphorylation, autophosphorylation	Cytoplasmic
PADG_04786	GPI ethanolamine phosphate transferase [Paracoccidioides brasiliensis Pb18]	modification by phosphorylation, dephosphorylation, autophosphorylation	Plasma membrane-bound
PADG_07331	Ser/Thr protein phosphatase family protein [Paracoccidioides brasiliensis Pb18]	modification by phosphorylation, dephosphorylation, autophosphorylation	Plasma membrane-bound
PADG_01860	casein kinase II subunit beta [Paracoccidioides brasiliensis Pb18]	modification by phosphorylation, dephosphorylation, autophosphorylation	Nuclear
PADG_05596	serine/threonine-protein phosphatase PP-X isozyme 1 [Paracoccidioides brasiliensis Pb18]	modification by phosphorylation, dephosphorylation, autophosphorylation	Nuclear
PADG_06915	Protein phosphatase 2C domain containing protein [Paracoccidioides brasiliensis Pb18]	modification by phosphorylation, dephosphorylation, autophosphorylation	Nuclear
PADG_00245	ser/Thr protein phosphatase family [Paracoccidioides brasiliensis Pb18]	modification by phosphorylation, dephosphorylation, autophosphorylation	_
PADG_02230	protein kinase byr2	modification by phosphorylation, dephosphorylation, autophosphorylation	Nuclear
PADG_08685	serine/threonine-protein phosphatase PP1 [Paracoccidioides brasiliensis Pb18]	modification by phosphorylation, dephosphorylation, autophosphorylation	Plasma membrane-bound
PADG_08657	GPI ethanolamine phosphate transferase [Paracoccidioides brasiliensis Pb18]	modification by phosphorylation, dephosphorylation, autophosphorylation	Plasma membrane-bound
PADG_02390	MATH and UCH domain-containing protein [Paracoccidioides brasiliensis Pb18]	modification by ubiquitination, deubiquitination	Nuclear
PADG_04230	endosome-associated ubiquitin isopeptidase (AmsH) [Paracoccidioides brasiliensis Pb18]	modification by ubiquitination, deubiquitination	Nuclear
PADG_05868	RING-box protein HRT1 [Paracoccidioides brasiliensis Pb18]	modification by ubiquitination, deubiquitination	Cytoplasmic
PADG_04904	ariadne-1 [Paracoccidioides brasiliensis Pb18]	modification by ubiquitination, deubiquitination	Nuclear
PADG_04987	putative ubiquitin-protein ligase [Paracoccidioides brasiliensis Pb18]	modification by ubiquitination, deubiquitination	Plasma membrane-bound
PADG_06256	E3 ubiquitin-protein ligase bre1 [Paracoccidioides brasiliensis Pb18]	modification by ubiquitination, deubiquitination	Nuclear
PADG_03700	E3 ubiquitin-protein ligase ubr11 [Paracoccidioides brasiliensis Pb18]	modification by ubiquitination, deubiquitination	Nuclear
PADG_07834	ubiquitin carboxyl-terminal hydrolase [Paracoccidioides brasiliensis Pb18]	modification by ubiquitination, deubiquitination	Nuclear
PADG_03067	glutaminyl-peptide cyclotransferase [Paracoccidioides brasiliensis Pb18]	posttranslational modification of amino acids (e.g. hydroxylation, methylation)	Secreted (extracellular)
PADG_08639	Lamina-associated polypeptide 2 [Paracoccidioides brasiliensis Pb18]	protein processing (proteolytic)	secreted
PADG_01296	methionine aminopeptidase [Paracoccidioides brasiliensis Pb18]	protein processing (proteolytic)	Cytoplasmic
PADG_06766	mitochondrial-processing peptidase subunit beta [Paracoccidioides brasiliensis Pb18]	protein processing (proteolytic)	Mitochondrial
PADG_03721	mitochondrial intermediate peptidase [Paracoccidioides brasiliensis Pb18]	protein processing (proteolytic)	Nuclear
PADG_00929	mitochondrial chaperone BCS1 [Paracoccidioides brasiliensis Pb18]	protein processing (non-proteolytic, e.g. iron-incorporation)	Cytoplasmic
PADG_01040	peroxisome assembly protein [Paracoccidioides brasiliensis Pb18]	assembly of protein complexes	Nuclear
PADG_02927	mitochondrial chaperone bcs1 [Paracoccidioides brasiliensis Pb18]	assembly of protein complexes	Nuclear
PADG_05315	Putative metallocarboxypeptidase ECM14 [Paracoccidioides brasiliensis Pb18]	protein/peptide degradation	secreted
PADG_05922	beta-Ala-His dipeptidase	protein/peptide degradation	Cytoplasmic
PADG_08265	methionine aminopeptidase [Paracoccidioides brasiliensis Pb18]	protein/peptide degradation	Cytoplasmic
PADG_08282	pepsin A	protein/peptide degradation	Cytoplasmic
PADG_05160	dipeptidyl-peptidase [Paracoccidioides brasiliensis Pb18]	protein/peptide degradation	Mitochondrial
PADG_05193	xaa-Pro aminopeptidase [Paracoccidioides brasiliensis Pb18]	protein/peptide degradation	Cytoplasmic
PADG_05820	xaa-Pro aminopeptidase [Paracoccidioides brasiliensis Pb18]	protein/peptide degradation	Cytoplasmic
PADG_01601	M6 family metalloprotease	protein/peptide degradation	secreted
PADG_07693	glycoprotease pgp1 [Paracoccidioides brasiliensis Pb18]	protein/peptide degradation	Mitochondrial
PADG_07630	N-acetylated-alpha-linked acidic dipeptidase [Paracoccidioides brasiliensis Pb18]	protein/peptide degradation	secreted
PADG_06815	xaa-Pro dipeptidase [Paracoccidioides brasiliensis Pb18]	protein/peptide degradation	Cytoplasmic
PADG_04952	matrix AAA protease MAP-1 [Paracoccidioides brasiliensis Pb18]	protein/peptide degradation	Mitochondrial
PADG_02421	insulin-degrading enzyme [Paracoccidioides brasiliensis Pb18]	protein/peptide degradation	Cytoplasmic
PADG_02636	26S protease regulatory subunit 4 [Paracoccidioides brasiliensis Pb18]	protein/peptide degradation	Nuclear
PADG_07542	membrane dipeptidase GliJ [Paracoccidioides brasiliensis Pb18]	protein/peptide degradation	Nuclear
PADG_03221	thimet oligopeptidase	protein/peptide degradation	Mitochondrial
PADG_03239	ATP-dependent protease La [Paracoccidioides brasiliensis Pb18]	protein/peptide degradation	Mitochondrial
PADG_03149	aminopeptidase [Paracoccidioides brasiliensis Pb18]	protein/peptide degradation	Mitochondrial
PADG_06276	O-sialoglycoprotein endopeptidase [Paracoccidioides brasiliensis Pb18]	protein/peptide degradation	Cytoplasmic
PADG_06207	candidapepsin-1 [Paracoccidioides brasiliensis Pb18]	protein/peptide degradation	Cytoplasmic
PADG_01747	proteasome-activating nucleotidase [Paracoccidioides brasiliensis Pb18]	protein/peptide degradation	Secreted (extracellular)
PADG_01943	dipeptidase [Paracoccidioides brasiliensis Pb18]	protein/peptide degradation	Mitochondrial
PADG_05563	ATP-dependent protease La 2 [Paracoccidioides brasiliensis Pb18]	protein/peptide degradation	Cytoplasmic
PADG_00510	peptidase family M28 family [Paracoccidioides brasiliensis Pb18]	protein/peptide degradation	_
PADG_00686	N-acetylated-alpha-linked acidic dipeptidase [Paracoccidioides brasiliensis Pb18]	protein/peptide degradation	Plasma membrane-bound
PADG_00776	24 kDa metalloproteinase [Paracoccidioides brasiliensis Pb18]	protein/peptide degradation	Secreted (extracellular)
PADG_04177	aminopeptidase Y [Paracoccidioides brasiliensis Pb18]	protein/peptide degradation	Secreted (extracellular)
PADG_04167	aspartyl aminopeptidase [Paracoccidioides brasiliensis Pb18]	protein/peptide degradation	Mitochondrial
PADG_04125	mitochondrial presequence protease [Paracoccidioides brasiliensis Pb18]	protein/peptide degradation	Mitochondrial
PADG_04088	zinc metalloprotease [Paracoccidioides brasiliensis Pb18]	protein/peptide degradation	Cytoplasmic
PADG_04087	CAAX prenyl protease [Paracoccidioides brasiliensis Pb18]	protein/peptide degradation	Plasma membrane-bound
PADG_03629	pre-60S factor REI1 [Paracoccidioides brasiliensis Pb18]	protein/peptide degradation	Nuclear
PADG_03622	WD repeat-containing domain putative peptidase [Paracoccidioides brasiliensis Pb18]	protein/peptide degradation	Nuclear
PADG_03595	xaa-pro dipeptidase [Paracoccidioides brasiliensis Pb18]	protein/peptide degradation	Mitochondrial
PADG_07053	a-pheromone processing metallopeptidase Ste23 [Paracoccidioides brasiliensis Pb18]	protein/peptide degradation	Nuclear
PADG_04451	26S proteasome regulatory subunit RPN11	proteasomal degradation (ubiquitin/proteasomal pathway)	Cytoplasmic
PADG_00632	26S protease regulatory subunit 6B [Paracoccidioides brasiliensis Pb18]	proteasomal degradation (ubiquitin/proteasomal pathway)	Nuclear
PADG_00300	26S protease regulatory subunit 8 [Paracoccidioides brasiliensis Pb18]	proteasomal degradation (ubiquitin/proteasomal pathway)	Cytoplasmic
PADG_00051	26S protease regulatory subunit 8 [Paracoccidioides brasiliensis Pb18]	proteasomal degradation (ubiquitin/proteasomal pathway)	Cytoplasmic
PADG_03427	homologous to E3 ubiquitin-protein ligase [Paracoccidioides brasiliensis Pb18]	proteasomal degradation (ubiquitin/proteasomal pathway)	Nuclear
PADG_00599	26S protease regulatory subunit 6A [Paracoccidioides brasiliensis Pb18]	proteasomal degradation (ubiquitin/proteasomal pathway)	Nuclear
PADG_07460	vacuolar aminopeptidase [Paracoccidioides brasiliensis Pb18]	lysosomal and vacuolar protein degradation	Mitochondrial
PADG_00634	vacuolar protease A [Paracoccidioides brasiliensis Pb18]	lysosomal and vacuolar protein degradation	Secreted (extracellular)
PADG_01226	IBR domain-containing protein [Paracoccidioides brasiliensis Pb18]	protein binding	_
PADG_03279	LIM domain-containing protein [Paracoccidioides brasiliensis Pb18]	protein binding	Nuclear
PADG_06362	nucleolar protein NOP2	nucleic acid binding	nuclear
PADG_08081	DNA-binding protein HEXBP [Paracoccidioides brasiliensis Pb18]	DNA binding	Nuclear
PADG_00975	MYB DNA-binding domain-containing protein	DNA binding	Nuclear
PADG_04311	zinc knuckle nucleic acid binding protein [Paracoccidioides brasiliensis Pb18]	DNA binding	Nuclear
PADG_07459	RNA-binding protein NOB1 [Paracoccidioides brasiliensis Pb18]	RNA binding	Nuclear
PADG_06562	FYVE domain-containing protein	lipid binding	nuclear
PADG_01298	EF hand domain-containing protein [Paracoccidioides brasiliensis Pb18]	calcium bniding	_
PADG_04869	HIT domain protein	nucleotide/nucleoside/nucleobase binding	nuclear
PADG_01814	HIT domain-containing protein [Paracoccidioides brasiliensis Pb18]	nucleotide/nucleoside/nucleobase binding	_
PADG_01419	developmentally regulated GTP-binding protein [Paracoccidioides brasiliensis Pb18]	GTP binding	Cytoplasmic
PADG_04846	GTP-binding protein [Paracoccidioides brasiliensis Pb18]	GTP binding	Nuclear
PADG_04610	GTP-binding protein [Paracoccidioides brasiliensis Pb18]	GTP binding	_
PADG_07336	mitochondrial GTPase [Paracoccidioides brasiliensis Pb18]	GTP binding	Mitochondrial
PADG_03134	nucleolar GTP-binding protein [Paracoccidioides brasiliensis Pb18]	GTP binding	Nuclear
PADG_01849	GTP-dependent nucleic acid-binding protein engD [Paracoccidioides brasiliensis Pb18]	GTP binding	Cytoplasmic
PADG_01918	GTP-binding protein [Paracoccidioides brasiliensis Pb18]	GTP binding	Mitochondrial
PADG_00732	GTPase MTG2 [Paracoccidioides brasiliensis Pb18]	GTP binding	Mitochondrial
PADG_02207	GTP-binding protein [Paracoccidioides brasiliensis Pb18]	GTP binding	Cytoplasmic
PADG_05181	JmjC domain-containing protein [Paracoccidioides brasiliensis Pb18]	Regulator of transcription factor	_
PADG_05322	ZIP Zinc transporter family protein [Paracoccidioides brasiliensis Pb18]	ion transport	Plasma membrane-bound
PADG_08196	zinc transporter 1 [Paracoccidioides brasiliensis Pb18]	ion transport	Plasma membrane-bound
PADG_05813	zinc-regulated transporter 2 [Paracoccidioides brasiliensis Pb18]	ion transport	Plasma membrane-bound
PADG_00917	copper-transporting P-type ATPase	ion transport	Plasma membrane-bound
PADG_01582	copper-transporting ATPase [Paracoccidioides brasiliensis Pb18]	ion transport	Plasma membrane-bound
PADG_07735	zinc ion binding protein	ion transport	Cytoplasmic
PADG_07702	cation efflux family protein [Paracoccidioides brasiliensis Pb18]	ion transport	Mitochondrial
PADG_02423	ZIP family zinc transporter [Paracoccidioides brasiliensis Pb18]	ion transport	Plasma membrane-bound
PADG_03307	ZIP Zinc transporter [Paracoccidioides brasiliensis Pb18]	ion transport	Plasma membrane-bound
PADG_03376	copper transporting P-type ATPase protein [Paracoccidioides brasiliensis Pb18]	ion transport	Plasma membrane-bound
PADG_06417	zinc-regulated transporter 2 [Paracoccidioides brasiliensis Pb18]	ion transport	Plasma membrane-bound
PADG_06381	CDF zinc transporter [Paracoccidioides brasiliensis Pb18]	ion transport	Plasma membrane-bound
PADG_06308	cation efflux family protein [Paracoccidioides brasiliensis Pb18]	ion transport	Plasma membrane-bound
PADG_01961	cation transport protein [Paracoccidioides brasiliensis Pb18]	ion transport	Plasma membrane-bound
PADG_00712	ZIP Zinc transporter family protein [Paracoccidioides brasiliensis Pb18]	ion transport	Plasma membrane-bound
PADG_07158	zinc transporter SLC39A9 [Paracoccidioides brasiliensis Pb18]	ion transport	Plasma membrane-bound
PADG_06706	cation diffusion facilitator 1 [Paracoccidioides brasiliensis Pb18]	cation transport (H+, Na+, K+, Ca2+ , NH4+, etc.)	Plasma membrane-bound
PADG_08567	zinc-regulated transporter 1 [Paracoccidioides brasiliensis Pb18]	heavy metal ion transport (Cu+, Fe3+, etc.)	Plasma membrane-bound
PADG_05884	mitochondrial import inner membrane translocase subunit TIM8 [Paracoccidioides brasiliensis Pb18]	protein transport	Nuclear
PADG_03509	stromal membrane-associated protein	protein transport	Mitochondrial
PADG_08008	zinc-binding oxidoreductase ToxD [Paracoccidioides brasiliensis Pb18]	electron transport	_
PADG_02492	putative zinc-binding oxidoreductase [Paracoccidioides brasiliensis Pb18]	electron transport	cytoplasmic
PADG_05029	mRNA export protein	RNA transport	nuclear
PADG_04902	katanin p60 ATPase-containing subunit	transport ATPases	Cytoplasmic, nuclear and mitochondrial
PADG_00622	arsenical pump-driving ATPase [Paracoccidioides brasiliensis Pb18]	transport ATPases	Cytoplasmic
PADG_00898	vesicular-fusion protein SEC18 [Paracoccidioides brasiliensis Pb18]	vesicular transport (Golgi network, etc.)	Endoplasmic reticulum
PADG_07804	transport protein sec23 [Paracoccidioides brasiliensis Pb18]	vesicular transport (Golgi network, etc.)	Mitochondrial
PADG_05018	vacuolar membrane protein PEP5 [Paracoccidioides brasiliensis Pb18]	vesicular transport (Golgi network, etc.)	Nuclear
PADG_04883	transport protein SEC24 [Paracoccidioides brasiliensis Pb18]	ER to Golgi transport	Cytoplasmic
PADG_06162	vacuolar segregation protein pep7 [Paracoccidioides brasiliensis Pb18]	vacuolar/lysosomal transport	Nuclear
PADG_04534	dDENN domain-containing protein [Paracoccidioides brasiliensis Pb18]	cellular signalling	Plasma membrane-bound
PADG_03284	Actin polymerization protein Bzz1, putative [Paracoccidioides brasiliensis Pb18]	cellular signalling	Nuclear
PADG_03416	TRAF-type zinc finger protein [Paracoccidioides brasiliensis Pb18]	cellular signalling	Nuclear
PADG_03457	fungal Zn binuclear cluster domain-containing protein	cellular signalling	nuclear
PADG_02845	diploid state maintenance protein chpA	cellular signalling	Nuclear
PADG_04009	ARF GTPase activator (Csx2) [Paracoccidioides brasiliensis Pb18]	cellular signalling	Nuclear
PADG_04012	high affinity cAMP-specific 3',5'-cyclic phosphodiesterase [Paracoccidioides brasiliensis Pb18]	cAMP/cGMP mediated signal transduction	Nuclear
PADG_02895	heat shock protein [Paracoccidioides brasiliensis Pb18]	stress response	Mitochondrial
PADG_00765	heat shock protein HSP98 [Paracoccidioides brasiliensis Pb18]	stress response	Cytoplasmic
PADG_00085	arsenite resistance protein Ars2	stress response	nuclear
PADG_03508	peptide methionine sulfoxide reductase msrB [Paracoccidioides brasiliensis Pb18]	stress response	Mitochondrial
PADG_06765	NADP-dependent leukotriene B4 12-hydroxydehydrogenase	detoxification	_
PADG_07174	glutathione-dependent formaldehyde-activating [Paracoccidioides brasiliensis Pb18]	glutathione conjugation reaction	Cytoplasmic
PADG_07418	superoxide dismutase [Paracoccidioides brasiliensis Pb18]	superoxide metabolism	Cytoplasmic
PADG_02842	cytosolic Cu/Zn superoxide dismutase [Paracoccidioides brasiliensis Pb18]	superoxide metabolism	Secreted (extracellular)
PADG_04128	zinc/cadmium resistance protein [Paracoccidioides brasiliensis Pb18]	homeostasis of metal ions (Na, K, Ca etc.)	Plasma membrane-bound
PADG_02352	Metal homeostasis factor ATX1 (copper chaperone) [Paracoccidioides brasiliensis Pb18]	homeostasis of metal ions (Na, K, Ca etc.)	Plasma membrane-bound
PADG_01089	COP9 signalosome complex subunit 5 [Paracoccidioides brasiliensis Pb18]	photoperception and response	Cytoplasmic
PADG_02915	copia-like retrotransposon family protein [Paracoccidioides brasiliensis Pb18]	LTR retroelements (retroviral)	Nuclear
PADG_07556	adenosine deaminase family protein [Paracoccidioides brasiliensis Pb18]	cell growth / morphogenesis	Nuclear
PADG_08058	GPI ethanolamine phosphate transferase [Paracoccidioides brasiliensis Pb18]	cell wall	Plasma membrane-bound
PADG_07284	peroxisome assembly protein [Paracoccidioides brasiliensis Pb18]	peroxisome	Peroxisomal
PADG_08559	peroxisome biosynthesis protein PAS1 [Paracoccidioides brasiliensis Pb18]	peroxisome	Peroxisomal
PADG_00061	peroxisomal biogenesis factor 6 [Paracoccidioides brasiliensis Pb18]	peroxisome	Peroxisomal
PADG_03343	developmental protein fluG [Paracoccidioides brasiliensis Pb18]	fungal and other eukaryotic cell type differentiation	Cytoplasmic
PADG_00068	rho-type GTPase-activating protein [Paracoccidioides brasiliensis Pb18]	development of asco- basidio- or zygospore	Nuclear
