# Supplementary material for: Predicting copper-, iron-, and zinc-binding proteins in pathogenic species of the Paracoccidioides genus
Source: Front Microbiol. 2015 Jan 9;5:761. doi: 10.3389/fmicb.2014.00761 (PMC4288321; doi:10.3389/fmicb.2014.00761)
Supplement: Supplementary file 4 [file Table4.XLSX]

## Sheet: Pb01
Supplementary Table 4 - Two metal binding proteins found in P. lutzii
Iron and Zinc				Copper and Zinc				Iron and Copper
Pb01 Accesion Number	Description	Metal		Pb01 Accesion Number	Description	Metal		Pb01 Accesion Number	Description	Metal
PAAG_08914	lactoylglutathione lyase [Paracoccidioides brasiliensis Pb01]	Zn		PAAG_08210	conserved hypothetical protein [Paracoccidioides brasiliensis Pb01]	Zn		PAAG_03629	xanthine dehydrogenase [Paracoccidioides brasiliensis Pb01]	Fe
PAAG_08788	endoribonuclease ysh1 [Paracoccidioides brasiliensis Pb01]	Zn		PAAG_07154	copper-transporting P-type ATPase [Paracoccidioides brasiliensis Pb01]	Zn		PAAG_02640	aldehyde oxidoreductase [Paracoccidioides brasiliensis Pb01]	Fe
PAAG_08166	4-hydroxyphenylpyruvate dioxygenase [Paracoccidioides brasiliensis Pb01]	Fe		PAAG_07053	copper-transporting ATPase [Paracoccidioides brasiliensis Pb01]	Cu
PAAG_07428	allantoinase [Paracoccidioides brasiliensis Pb01]	Fe		PAAG_04164	superoxide dismutase [Paracoccidioides brasiliensis Pb01]	Zn/Cu
PAAG_07488	JmjC domain-containing protein [Paracoccidioides brasiliensis Pb01]	Fe/Ca		PAAG_03881	cation transport ATPase [Paracoccidioides brasiliensis Pb01]	Mg
PAAG_07050	conserved hypothetical protein [Paracoccidioides brasiliensis Pb01]	Zn		PAAG_02971	cytosolic Cu/Zn superoxide dismutase [Paracoccidioides brasiliensis Pb01]	Zn/Cu
PAAG_06744	conserved hypothetical protein [Paracoccidioides brasiliensis Pb01]	Mn
PAAG_06410	ZZ type zinc finger protein [Paracoccidioides brasiliensis Pb01]	Zn
PAAG_05696	glycoprotease pgp1 [Paracoccidioides brasiliensis Pb01]	Zn
PAAG_05483	ser/Thr protein phosphatase family protein [Paracoccidioides brasiliensis Pb01]	Mn
PAAG_05049	metallo-beta-lactamase domain-containing protein [Paracoccidioides brasiliensis Pb01]	Zn
PAAG_05247	double-strand break repair protein mus-23 [Paracoccidioides brasiliensis Pb01]	Mn
PAAG_05250	serine/threonine-protein phosphatase ppe1 [Paracoccidioides brasiliensis Pb01]	Mn
PAAG_04055	conserved hypothetical protein [Paracoccidioides brasiliensis Pb01]	Mn
PAAG_04304	conserved hypothetical protein [Paracoccidioides brasiliensis Pb01]	Zn
PAAG_02984	endopolyphosphatase [Paracoccidioides brasiliensis Pb01]	Mg/Mn
PAAG_03063	conserved hypothetical protein [Paracoccidioides brasiliensis Pb01]	Zn
PAAG_03261	metallo-beta-lactamase family protein [Paracoccidioides brasiliensis Pb01]	Zn
PAAG_03406	isochorismatase family protein family [Paracoccidioides brasiliensis Pb01]	Mn
PAAG_03466	5'-nucleotidase [Paracoccidioides brasiliensis Pb01]	Zn
PAAG_03548	O-sialoglycoportein endopeptidase [Paracoccidioides brasiliensis Pb01]	Zn
PAAG_02615	4-hydroxyphenylpyruvate dioxygenase [Paracoccidioides brasiliensis Pb01]	Fe
PAAG_02446	serine/threonine-protein phosphatase PP-X isozyme 1 [Paracoccidioides brasiliensis Pb01]	Mn
PAAG_02548	hydroxyacylglutathione hydrolase [Paracoccidioides brasiliensis Pb01]	Zn
PAAG_01835	ser/Thr protein phosphatase family protein [Paracoccidioides brasiliensis Pb01]	Mn
PAAG_02157	GRF zinc finger domain-containing protein [Paracoccidioides brasiliensis Pb01]	Fe
PAAG_01420	metallo-beta-lactamase superfamily protein [Paracoccidioides brasiliensis Pb01]	Zn
PAAG_01535	ser/Thr protein phosphatase family [Paracoccidioides brasiliensis Pb01]	Mn
PAAG_01569	guanine deaminase [Paracoccidioides brasiliensis Pb01]	Zn
PAAG_01604	conserved hypothetical protein [Paracoccidioides brasiliensis Pb01]	Mn
PAAG_00700	cell division control protein [Paracoccidioides brasiliensis Pb01]	Fe
PAAG_00954	urease [Paracoccidioides brasiliensis Pb01]	Mg
PAAG_01011	JmjC domain-containing histone demethylation protein [Paracoccidioides brasiliensis Pb01]	Fe/Zn
PAAG_00472	serine/threonine-protein phosphatase [Paracoccidioides brasiliensis Pb01]	Mn

## Sheet: Pb03
Supplementary Table 4 - Two metal binding proteins found in P. brasiliensis isolate Pb18.
Iron and Zinc				Copper and Zinc				Iron and Copper
Pb03 Accesion Number	Description	Metal		Pb03 Accesion Number	Description	Metal		Pb03 Accesion Number	Description	Metal
PABG_05875	glyoxylase [Paracoccidioides brasiliensis Pb03]	Zn		PABG_06777	conserved hypothetical protein [Paracoccidioides brasiliensis Pb03]	Zn		PABG_06956	xanthine dehydrogenase [Paracoccidioides brasiliensis Pb03]	Fe
PABG_05902	conserved hypothetical protein [Paracoccidioides brasiliensis Pb03]	Zn		PABG_07429	predicted protein [Paracoccidioides brasiliensis Pb03]	Cu		PABG_03125	xanthine dehydrogenase [Paracoccidioides brasiliensis Pb03]	Fe
PABG_06128	endoribonuclease ysh1 [Paracoccidioides brasiliensis Pb03]	Zn		PABG_00431	cytosolic Cu/Zn superoxide dismutase [Paracoccidioides brasiliensis Pb03]	Zn/Cu
PABG_06413	conserved hypothetical protein [Paracoccidioides brasiliensis Pb03]	Fe		PABG_00906	copper-transporting P-type ATPase copA [Paracoccidioides brasiliensis Pb03]	Mg
PABG_06737	serine/threonine-protein phosphatase PP1 [Paracoccidioides brasiliensis Pb03]	Mn		PABG_02495	copper-transporting P-type ATPase [Paracoccidioides brasiliensis Pb03]	Mg
PABG_06812	nucleotidase of the calcineurin superfamily protein [Paracoccidioides brasiliensis Pb03]	Zn		PABG_03057	copper-transporting ATPase [Paracoccidioides brasiliensis Pb03]	Mg
PABG_06884	O-sialoglycoprotein endopeptidase [Paracoccidioides brasiliensis Pb03]	Zn		PABG_03954	superoxide dismutase [Paracoccidioides brasiliensis Pb03]	Zn/Cu
PABG_07162	allantoinase [Paracoccidioides brasiliensis Pb03]	Zn
PABG_07219	conserved hypothetical protein [Paracoccidioides brasiliensis Pb03]	Fe
PABG_07394	4-hydroxyphenylpyruvate dioxygenase [Paracoccidioides brasiliensis Pb03]	Na
PABG_00445	endopolyphosphatase [Paracoccidioides brasiliensis Pb03]	Fe
PABG_00523	conserved hypothetical protein [Paracoccidioides brasiliensis Pb03]	Zn
PABG_00699	beta-lactamase domain-containing protein [Paracoccidioides brasiliensis Pb03]	Zn
PABG_07608	serine/threonine-protein phosphatase PP-V [Paracoccidioides brasiliensis Pb03]	Fe/Zn
PABG_07612	double-strand break repair protein mus-23 [Paracoccidioides brasiliensis Pb03]	Zn
PABG_01040	conserved hypothetical protein [Paracoccidioides brasiliensis Pb03]	Fe
PABG_01291	urease [Paracoccidioides brasiliensis Pb03]	Ni
PABG_01523	conserved hypothetical protein [Paracoccidioides brasiliensis Pb03]	Zn
PABG_07773	lactoylglutathione lyase [Paracoccidioides brasiliensis Pb03]	Fe/Zn
PABG_01964	beta-lactamase domain-containing protein [Paracoccidioides brasiliensis Pb03]	Fe/Zn
PABG_02114	metallophosphoesterase domain-containing protein [Paracoccidioides brasiliensis Pb03]	Zn
PABG_02393	conserved hypothetical protein [Paracoccidioides brasiliensis Pb03]	Fe
PABG_07840	serine/threonine-protein phosphatase PP-Z [Paracoccidioides brasiliensis Pb03]	Fe
PABG_02810	predicted protein [Paracoccidioides brasiliensis Pb03]	Zn
PABG_03054	metallophosphoesterase [Paracoccidioides brasiliensis Pb03]	Fe/Zn
PABG_03102	4-hydroxyphenylpyruvate dioxygenase [Paracoccidioides brasiliensis Pb03]	Na/Co
PABG_03593	vacuolar protein [Paracoccidioides brasiliensis Pb03]	Zn
PABG_03623	guanine deaminase [Paracoccidioides brasiliensis Pb03]	Zn
PABG_03882	conserved hypothetical protein [Paracoccidioides brasiliensis Pb03]	Fe
PABG_04080	histone demethylase JARID1C [Paracoccidioides brasiliensis Pb03]	Zn
PABG_04505	metallo-beta-lactamase domain-containing protein [Paracoccidioides brasiliensis Pb03]	Zn

## Sheet: Pb18
Supplementary Table 4 - Two metal binding proteins found in P. brasiliensis isolate Pb18.
Iron and Zinc				Copper and Zinc				Iron and Copper
Pb18 Accesion Number	Description	Metal		Pb18 Accesion Number	Description	Metal		Pb18 Accesion Number	Description	Metal
PADG_07331	conserved hypothetical protein [Paracoccidioides brasiliensis Pb18]	Zn		PADG_07418	superoxide dismutase [Paracoccidioides brasiliensis Pb18]	Cu		PADG_01660	xanthine dehydrogenase [Paracoccidioides brasiliensis Pb18]	Fe
PADG_07535	conserved hypothetical protein [Paracoccidioides brasiliensis Pb18]	Zn		PADG_00917	copper-sulfate regulated protein [Paracoccidioides brasiliensis Pb18]	Cu		PADG_06197	xanthine dehydrogenase [Paracoccidioides brasiliensis Pb18]	Fe
PADG_07693	glycoprotease pgp1 [Paracoccidioides brasiliensis Pb18]	Zn		PADG_01582	copper-transporting ATPase [Paracoccidioides brasiliensis Pb18]	Cu
PADG_08468	4-hydroxyphenylpyruvate dioxygenase [Paracoccidioides brasiliensis Pb18]	Fe		PADG_02842	conserved hypothetical protein [Paracoccidioides brasiliensis Pb18]	Cu/Zn
PADG_00209	guanine deaminase [Paracoccidioides brasiliensis Pb18]	Zn		PADG_03376	copper transporting P-type ATPase protein [Paracoccidioides brasiliensis Pb18]	Cu
PADG_00245	ser/Thr protein phosphatase family [Paracoccidioides brasiliensis Pb18]	Fe/Zn
PADG_00348	metallo-beta-lactamase superfamily protein [Paracoccidioides brasiliensis Pb18]	Zn
PADG_00739	GRF zinc finger domain-containing protein [Paracoccidioides brasiliensis Pb18]	Fe
PADG_08673	lactoylglutathione lyase [Paracoccidioides brasiliensis Pb18]	Ni/Zn
PADG_01309	ZZ type zinc finger protein [Paracoccidioides brasiliensis Pb18]	Zn
PADG_01579	conserved hypothetical protein [Paracoccidioides brasiliensis Pb18]	Fe
PADG_01636	4-hydroxyphenylpyruvate dioxygenase [Paracoccidioides brasiliensis Pb18]	Fe
PADG_08685	serine/threonine-protein phosphatase PP1 [Paracoccidioides brasiliensis Pb18]	Mn
PADG_02857	endopolyphosphatase [Paracoccidioides brasiliensis Pb18]	Mg
PADG_03136	metallo-beta-lactamase family protein [Paracoccidioides brasiliensis Pb18]	Zn
PADG_03818	JmjC domain-containing histone demethylation protein [Paracoccidioides brasiliensis Pb18]	Fe
PADG_03871	urease [Paracoccidioides brasiliensis Pb18]	Mg
PADG_04133	conserved hypothetical protein [Paracoccidioides brasiliensis Pb18]	Na
PADG_04448	conserved hypothetical protein [Paracoccidioides brasiliensis Pb18]	Zn
PADG_04899	conserved hypothetical protein [Paracoccidioides brasiliensis Pb18]	Zn
PADG_05078	double-strand break repair protein mus-23 [Paracoccidioides brasiliensis Pb18]	Mn
PADG_05082	serine/threonine-protein phosphatase ppe1 [Paracoccidioides brasiliensis Pb18]	Mg/Mn
PADG_05126	allantoinase [Paracoccidioides brasiliensis Pb18]	Fe
PADG_05181	JmjC domain-containing protein [Paracoccidioides brasiliensis Pb18]	Fe
PADG_05596	serine/threonine-protein phosphatase PP-X isozyme 1 [Paracoccidioides brasiliensis Pb18]	Mg/Mn
PADG_06276	O-sialoglycoprotein endopeptidase [Paracoccidioides brasiliensis Pb18]	Zn
PADG_06357	5'-nucleotidase [Paracoccidioides brasiliensis Pb18]	Zn
PADG_06576	endoribonuclease ysh1 [Paracoccidioides brasiliensis Pb18]	Zn
PADG_06837	ser/Thr protein phosphatase family [Paracoccidioides brasiliensis Pb18]	Mn
PADG_06872	conserved hypothetical protein [Paracoccidioides brasiliensis Pb18]	Zn
